# Supplementary material for: Discovery of a Novel Intron in US10/US11/US12 of HSV-1 Strain 17
Source: MDPI journal article supplement (doi:10.3390/v15112144), 2023-10-25
Supplement: s1 [file s1]

# Supplemental Data S1: Alignment of the US11 Gene with the Same Gene Length of US11 Gene in HSV-1 Strain 17

|             |                                                             |    |
|-------------|-------------------------------------------------------------|----|
| NC_001806.2 | ATGAGCCAGACCCAACCCCGGCCCCAGTTGGGCCGGGCGACCCAGATGTTTACTTAAAA | 60 |
| X02138.1    | ATGAGCCAGACCCAACCCCGGCCCCAGTTGGGCCGGGCGACCCAGATGTTTACTTAAAA | 60 |
| MH319852.1  | ATGAGCCAGACCCAACCCCGGCCCCAGTTGGGCCGGGCGACCCAGATGTTTACTTAAAA | 60 |
| OP297873.1  | ATGAGCCAGACCCAACCCCGGCCCCAGTTGGGCCGGGCGACCCAGATGTTTACTTAAAA | 60 |
| KR011283.1  | ATGAGCCAGACCCAACCCCGGCCCCAGTTGGGCCGGGCGACCCAGATGTTTACTTAAAA | 60 |
| X14112.1    | ATGAGCCAGACCCAACCCCGGCCCCAGTTGGGCCGGGCGACCCAGATGTTTACTTAAAA | 60 |
| KR011281.1  | ATGAGCCAGACCCAACCCCGGCCCCAGTTGGGCCGGGCGACCCAGATGTTTACTTAAAA | 60 |
| MG646679.1  | ATGAGCCAGACCCAACCCCGGCCCCAGTTGGGCCGGGCGACCCAGATGTTTACTTAAAA | 60 |
| OP297879.1  | ATGAGCCAGACCCAACCCCGGCCCCAGTTGGGCCGGGCGACCCAGATGTTTACTTAAAA | 60 |
| MH160384.1  | ATGAGCCAGACCCAACCCCGGCCCCAGTTGGGCCGGGCGACCCAGATGTTTACTTAAAA | 60 |
| JN420342.2  | ATGAGCCAGACCCAACCCCGGCCCCAGTTGGGCCGGGCGACCCAGATGTTTACTTAAAA | 60 |
| MG999890.1  | ATGAGCCAGACCCAACCCCGGCCCCAGTTGGGCCGGGCGACCCAGATGTTTACTTAAAA | 60 |
| MG999850.1  | ATGAGCCAGACCCAACCCCGGCCCCAGTTGGGCCGGGCGACCCAGATGTTTACTTAAAA | 60 |
| MH999848.1  | ATGAGCCAGACCCAACCCCGGCCCCAGTTGGGCCGGGCGACCCAGATGTTTACTTAAAA | 60 |
| MH160390.1  | ATGAGCCAGACCCAACCCCGGCCCCAGTTGGGCCGGGCGACCCAGATGTTTACTTAAAA | 60 |
| GU734772.1  | ATGAGCCAGACCCAACCCCGGCCCCAGTTGGGCCGGGCGACCCAGATGTTTACTTAAAA | 60 |
| MG999839.1  | ATGAGCCAGACCCAACCCCGGCCCCAGTTGGGCCGGGCGACCCAGATGTTTACTTAAAA | 60 |
| JN420341.1  | ATGAGCCAGACCCAACCCCGGCCCCAGTTGGGCCGGGCGACCCAGATGTTTACTTAAAA | 60 |
| JN400093.1  | ATGAGCCAGACCCAACCCCGGCCCCAGTTGGGCCGGGCGACCCAGATGTTTACTTAAAA | 60 |
| MG999872.1  | ATGAGCCAGACCCAACCCCGGCCCCAGTTGGGCCGGGCGACCCAGATGTTTACTTAAAA | 60 |
| JN420340.1  | ATGAGCCAGACCCAACCCCGGCCCCAGTTGGGCCGGGCGACCCAGATGTTTACTTAAAA | 60 |
| JN420339.1  | ATGAGCCAGACCCAACCCCGGCCCCAGTTGGGCCGGGCGACCCAGATGTTTACTTAAAA | 60 |
| MN159383.1  | ATGAGCCAGACCCAACCCCGGCCCCAGTTGGGCCGGGCGACCCAGATGTTTACTTAAAA | 60 |
| JN420337.1  | ATGAGCCAGACCCAACCCCGGCCCCAGTTGGGCCGGGCGACCCAGATGTTTACTTAAAA | 60 |
| JN420338.1  | ATGAGCCAGACCCAACCCCGGCCCCAGTTGGGCCGGGCGACCCAGATGTTTACTTAAAA | 60 |
| MH160388.1  | ATGAGCCAGACCCAACCCCGGCCCCAGTTGGGCCGGGCGACCCAGATGTTTACTTAAAA | 60 |
|             | *****                                                       |    |

|             |                                                            |     |
|-------------|------------------------------------------------------------|-----|
| NC_001806.2 | GGCGTGCCGTCCGCCGGCATGCACCCAGAGGTGTTACGCACCTCGAGGACACCCGCGC | 120 |
| X02138.1    | GGCGTGCCGTCCGCCGGCATGCACCCAGAGGTGTTACGCACCTCGAGGACACCCGCGC | 120 |
| MH319852.1  | GGCGTGCCGTCCGCCGGCATGCACCCAGAGGTGTTACGCACCTCGAGGACACCCGCGC | 120 |
| OP297873.1  | GGCGTGCCGTCCGCCGGCATGCACCCAGAGGTGTTACGCACCTCGAGGACACCCGCGC | 120 |
| KR011283.1  | GGCGTGCCGTCCGCCGGCATGCACCCAGAGGTGTTACGCACCTCGAGGACACCCGCGC | 120 |
| X14112.1    | GGCGTGCCGTCCGCCGGCATGCACCCAGAGGTGTTACGCACCTCGAGGACACCCGCGC | 120 |
| KR011281.1  | GGCGTGCCGTCCGCCGGCATGCACCCAGAGGTGTTACGCACCTCGAGGACACCCGCGC | 120 |
| MG646679.1  | GGCGTGCCGTCCGCCGGCATGCACCCAGAGGTGTTACGCACCTCGAGGACACCCGCGC | 120 |
| OP297879.1  | GGCGTGCCGTCCGCCGGCATGCACCCAGAGGTGTTACGCACCTCGAGGACACCCGCGC | 120 |
| MH160384.1  | GGCGTGCCGTCCGCCGGCATGCACCCAGAGGTGTTACGCACCTCGAGGACACCCGCGC | 120 |
| JN420342.2  | GGCGTGCCGTCCGCCGGCATGCACCCAGAGGTGTTACGCACCTCGAGGACACCCGCGC | 120 |
| MG999890.1  | GGCGTGCCGTCCGCCGGCATGCACCCAGAGGTGTTACGCACCTCGAGGACACCCGCGC | 120 |
| MG999850.1  | GGCGTGCCGTCCGCCGGCATGCACCCAGAGGTGTTACGCACCTCGAGGACACCCGCGC | 120 |
| MH999848.1  | GGCGTGCCGTCCGCCGGCATGCACCCAGAGGTGTTACGCACCTCGAGGACACCCGCGC | 120 |
| MH160390.1  | GGCGTGCCGTCCGCCGGCATGCACCCAGAGGTGTTACGCACCTCGAGGACACCCGCGC | 120 |
| GU734772.1  | GGCGTGCCGTCCGCCGGCATGCACCCAGAGGTGTTACGCACCTCGAGGACACCCGCGC | 120 |
| MG999839.1  | GGCGTGCCGTCCGCCGGCATGCACCCAGAGGTGTTACGCACCTCGAGGACACCCGCGC | 120 |
| JN420341.1  | GGCGTGCCGTCCGCCGGCATGCACCCAGAGGTGTTACGCACCTCGAGGACACCCGCGC | 120 |
| JN400093.1  | GGCGTGCCGTCCGCCGGCATGCACCCAGAGGTGTTACGCACCTCGAGGACACCCGCGC | 120 |
| MG999872.1  | GGCGTGCCGTCCGCCGGCATGCACCCAGAGGTGTTACGCACCTCGAGGACACCCGCGC | 120 |
| JN420340.1  | GGCGTGCCGTCCGCCGGCATGCACCCAGAGGTGTTACGCACCTCGAGGACACCCGCGC | 120 |
| JN420339.1  | GGCGTGCCGTCCGCCGGCATGCACCCAGAGGTGTTACGCACCTCGAGGACACCCGCGC | 120 |
| MN159383.1  | GGCATGCCGTCCGCCGGCATGCACCCAGAGGTGTTACGCACCTCGAGGACACCCGCGC | 120 |
| JN420337.1  | GGCATGCCGTCCGCCGGCATGCACCCAGAGGTGTTACGCACCTCGAGGACACCCGCGC | 120 |
| JN420338.1  | GGCATGCCGTCCGCCGGCATGCACCCAGAGGTGTTACGCACCTCGAGGACACCCGCGC | 120 |
| MH160388.1  | GGCGTGCCGTCCGCCGGCATGCACCCAGAGGTGTTACGCACCTCGAGGACACCCGCGC | 120 |
|             | ***                                                        |     |

|             |                                                              |     |
|-------------|--------------------------------------------------------------|-----|
| NC_001806.2 | ATGATCTCCGGACCCCCGCAACGGGGTGATAATGATCAAGCGGCGGGGCAATGTGGAGAT | 180 |
| X02138.1    | ATGATCTCCGGACCCCCGCAACGGGGTGATAATGATCAAGCGGCGGGGCAATGTGGAGAT | 180 |
| MH319852.1  | ATGATCTCCGGACCCCCGCAACGGGGTGATAATGATCAAGCGGCGGGGCAATGTGGAGAT | 180 |
| OP297873.1  | ATGATCTCCGGACCCCCGCAACGGGGTGATAATGATCAAGCGGCGGGGCAATGTGGAGAT | 180 |
| KR011283.1  | ATGATCTCCGGACCCCCGCAACGGGGTGATAATGATCAAGCGGCGGGGCAATGTGGAGAT | 180 |
| X14112.1    | ATGATCTCCGGACCCCCGCAACGGGGTGATAATGATCAAGCGGCGGGGCAATGTGGAGAT | 180 |
| KR011281.1  | ATGATCTCCGGACCCCCGCAACGGGGTGATAATGATCAAGCGGCGGGGCAATGTGGAGAT | 180 |
| MG646679.1  | ATGATCTCCGGACCCCCGCAACGGGGTGATAATGATCAAGCGGCGGGGCAATGTGGAGAT | 180 |
| OP297879.1  | ATGATCTCCGGACCCCCGCAACGGGGTGATAATGATCAAGCGGCGGGGCAATGTGGAGAT | 180 |
| MH160384.1  | ATGATCTCCGGACCCCCGCAACGGGGTGATAATGATCAAGCGGCGGGGCAATGTGGAGAT | 180 |
| JN420342.2  | ATGATCTCCGGACCCCCGCAACGGGGTGATAATGATCAAGCGGCGGGGCAATGTGGAGAT | 180 |
| MG999890.1  | ATGATCTCCGGACCCCCGCAACGGGGTGATAATGATCAAGCGGCGGGGCAATGTGGAGAT | 180 |
| MG999850.1  | ATGATCTCCGGACCCCCGCAACGGGGTGATAATGATCAAGCGGCGGGGCAATGTGGAGAT | 180 |
| MH999848.1  | ATGATCTCCGGACCCCCGCAACGGGGTGATAATGATCAAGCGGCGGGGCAATGTGGAGAT | 180 |
| MH160390.1  | ATGATCTCCGGACCCCCGCAACGGGGTGATAATGATCAAGCGGCGGGGCAATGTGGAGAT | 180 |
| GU734772.1  | ATGATCTCCGGACCCCCGCAACGGGGTGATAATGATCAAGCGGCGGGGCAATGTGGAGAT | 180 |
| MG999839.1  | ATGATCTCCGGACCCCCGCAACGGGGTGATAATGATCAAGCGGCGGGGCAATGTGGAGAT | 180 |
| JN420341.1  | ATGATCTCCGGACCCCCGCAACGGGGTGATAATGATCAAGCGGCGGGGCAATGTGGAGAT | 180 |
| JN400093.1  | ATGATCTCCGGACCCCCGCAACGGGGTGATAATGATCAAGCGGCGGGGCAATGTGGAGAT | 180 |
| MG999872.1  | ATGATCTCCGGACCCCCGCAACGGGGTGATAATGATCAAGCGGCGGGGCAATGTGGAGAT | 180 |
| JN420340.1  | ATGATCTCCGGACCCCCGCAACGGGGTGATAATGATCAAGCGGCGGGGCAATGTGGAGAT | 180 |
| JN420339.1  | ATGATCTCCGGACCCCCGCAACGGGGTGATAATGATCAAGCGGCGGGGCAATGTGGAGAT | 180 |
| MN159383.1  | ATGATCTCCGGACCCCCGCAACGGGGTGATAATGATCAAGCGGCGGGGCAATGTGGAGAT | 180 |
| JN420337.1  | ATGATCTCCGGACCCCCGCAACGGGGTGATAATGATCAAGCGGCGGGGCAATGTGGAGAT | 180 |
| JN420338.1  | ATGATCTCCGGACCCCCGCAACGGGGTGATAATGATCAAGCGGCGGGGCAATGTGGAGAT | 180 |
| MH160388.1  | ATGATCTCCGGACCCCCGCAACGGGGTGATAATGATCAAGCGGCGGGGCAATGTGGAGAT | 180 |
|             | *****                                                        |     |

|             |                                                              |     |
|-------------|--------------------------------------------------------------|-----|
| NC_001806.2 | TCGGGTCTACTACGAGTCGGTGCGGACACTACGATCTCGAAGCCATCTGAAGCCGTCCGA | 240 |
| X02138.1    | TCGGGTCTACTACGAGTCGGTGCGGACACTACGATCTCGAAGCCATCTGAAGCCGTCCGA | 240 |
| MH319852.1  | TCGGGTCTACTACGAGTCGGTGCGGACACTACGATCTCGAAGCCATCTGAAGCCGTCCGA | 240 |
| OP297873.1  | TCGGGTCTACTACGAGTCGGTGCGGACACTACGATCTCGAAGCCATCTGAAGCCGTCCGA | 240 |
| KR011283.1  | TCGGGTCTACTACGAGTCGGTGCGGACACTACGATCTCGAAGCCATCTGAAGCCGTCCGA | 240 |
| X14112.1    | TCGGGTCTACTACGAGTCGGTGCGGACACTACGATCTCGAAGCCATCTGAAGCCGTCCGA | 240 |
| KR011281.1  | TCGGGTCTACTACGAGTCGGTGCGGACACTACGATCTCGAAGCCATCTGAAGCCGTCCGA | 240 |
| MG646679.1  | TCGGGTCTACTACGAGTCGGTGCGGACACTACGATCTCGAAGCCATCTGAAGCCGTCCGA | 240 |
| OP297879.1  | TCGGGTCTACTACGAGTCGGTGCGGACACTACGATCTCGAAGCCATCTGAAGCCGTCCGA | 240 |
| MH160384.1  | TCGGGTCTACTACGAGTCGGTGCGGACACTACGATCTCGAAGCCATCTGAAGCCGTCCGA | 240 |
| JN420342.2  | TCGGGTCTACTACGAGTCGGTGCGGACACTACGATCTCGAAGCCATCTGAAGCCGTCCGA | 240 |
| MG999890.1  | TCGGGTCTACTACGAGTCGGTGCGGACACTACGATCTCGAAGCCATCTGAAGCCGTCCGA | 240 |
| MG999850.1  | TCGGGTCTACTACGAGTCGGTGCGGACACTACGATCTCGAAGCCATCTGAAGCCGTCCGA | 240 |
| MH999848.1  | TCGGGTCTACTACGAGTCGGTGCGGACACTACGATCTCGAAGCCATCTGAAGCCGTCCGA | 240 |
| MH160390.1  | TCGGGTCTACTACGAGTCGGTGCGGACACTACGATCTCGAAGCCATCTGAAGCCGTCCGA | 240 |
| GU734772.1  | TCGGGTCTACTACGAGTCGGTGCGGACACTACGATCTCGAAGCCATCTGAAGCCGTCCGA | 240 |
| MG999839.1  | TCGGGTCTACTACGAGTCGGTGCGGACACTACGATCTCGAAGCCATCTGAAGCCGTCCGA | 240 |
| JN420341.1  | TCGGGTCTACTACGAGTCGGTGCGGACACTACGATCTCGAAGCCATCTGAAGCCGTCCGA | 240 |
| JN400093.1  | TCGGGTCTACTACGAGTCGGTGCGGACACTACGATCTCGAAGCCATCTGAAGCCGTCCGA | 240 |
| MG999872.1  | TCGGGTCTACTACGAGTCGGTGCGGACACTACGATCTCGAAGCCATCTGAAGCCGTCCGA | 240 |
| JN420340.1  | TCGGGTCTACTACGAGTCGGTGCGGACACTACGATCTCGAAGCCATCTGAAGCCGTCCGA | 240 |
| JN420339.1  | TCGGGTCTACTACGAGTCGGTGCGGACACTACGATCTCGAAGCCATCTGAAGCCGTCCGA | 240 |
| MN159383.1  | TCGGGTCTACTACGAGTCGGTGCGGACACTACGATCTCGAAGCCATCTGAAGCCGTCCGA | 240 |
| JN420337.1  | TCGGGTCTACTACGAGTCGGTGCGGACACTACGATCTCGAAGCCATCTGAAGCCGTCCGA | 240 |
| JN420338.1  | TCGGGTCTACTACGAGTCGGTGCGGACACTACGATCTCGAAGCCATCTGAAGCCGTCCGA | 240 |
| MH160388.1  | TCGGGTCTACTACGAGTCGGTGCGGACACTACGATCTCGAAGCCATCTGAAGCCGTCCGA | 240 |
|             | *****                                                        |     |

|             |                                                                |     |
|-------------|----------------------------------------------------------------|-----|
| NC_001806.2 | CCGCCAACAAATCCCCAGGACACCGCGTGTTCCTCCGGGAGCCCCGGGTTCGCGGACCAACC | 300 |
| X02138.1    | CCGCCAACAAATCCCCAGGACACCGCGTGTTCCTCCGGGAGCCCCGGGTTCGCGGACCAACC | 300 |
| MH319852.1  | CCGCCAACAAATCCCCAGGACACCGCGTGTTCCTCCGGGAGCCCCGGGTTCGCGGACCAACC | 300 |
| OP297873.1  | CCGCCAACAAATCCCCAGGACACCGCGTGTTCCTCCGGGAGCCCCGGGTTCGCGGACCAACC | 300 |
| KR011283.1  | CCGCCAACAAATCCCCAGGACACCGCGTGTTCCTCCGGGAGCCCCGGGTTCGCGGACCAACC | 300 |
| X14112.1    | CCGCCAACAAATCCCCAGGACACCGCGTGTTCCTCCGGGAGCCCCGGGTTCGCGGACCAACC | 300 |
| KR011281.1  | CCGCCAACAAATCCCCAGGACACCGCGTGTTCCTCCGGGAGCCCCGGGTTCGCGGACCAACC | 300 |
| MG646679.1  | CCGCCAACAAATCCCCAGGACACCGCGTGTTCCTCCGGGAGCCCCGGGTTCGCGGACCAACC | 300 |
| OP297879.1  | CCGCCAACAAATCCCCAGGACACCGCGTGTTCCTCCGGGAGCCCCGGGTTCGCGGACCAACC | 300 |
| MH160384.1  | CCGCCAACAAATCCCCAGGACACCGCGTGTTCCTCCGGGAGCCCCGGGTTCGCGGACCAACC | 300 |
| JN420342.2  | CCGCCAACAAATCCCCAGGACACCGCGTGTTCCTCCGGGAGCCCCGGGTTCGCGGACCAACC | 300 |
| MG999890.1  | CTGCCAACAAATCCCCAGGACACCGCGTGTTCCTCCGGGAGCCCCGGGTTCGCGGACCAACC | 300 |
| MG999850.1  | CCGCCAACAAATCCCCAGGACACCGCGTGTTCCTCCGGGAGCCCCGGGTTCGCGGACCAACC | 300 |
| MH999848.1  | CCGCCAACAAATCCCCAGGACACCGCGTGTTCCTCCGGGAGCCCCGGGTTCGCGGACCAACC | 300 |
| MH160390.1  | CCGCCAACAAATCCCCAGGACACCGCGTGTTCCTCCGGGAGCCCCGGGTTCGCGGACCAACC | 300 |
| GU734772.1  | CCGCCAACAAATCCCCAGGACACCGCGTGTTCCTCCGGGAGCCCCGGGTTCGCGGACCAACC | 300 |
| MG999839.1  | CTGCCAACAAATCCCCAGGACACCGCGTGTTCCTCCGGGAGCCCCGGGTTCGCGGACCAACC | 300 |
| JN420341.1  | CCGCCAACATTTCCCCAGGACACCGCGTGTTCCTCCGGGAGCCCCGGGTTCGCGGACCAACC | 300 |
| JN400093.1  | CCGCCAACAAATCCCCAGGACACCGCGTGTTCCTCCGGGAGCCCCGGGTTCGCGGACCAACC | 300 |
| MG999872.1  | CCACCAACAATCCCCAGGACACCGCGTGTTCCTCCGGGAGCCCCGGGTTCGCGGACCAACC  | 300 |
| JN420340.1  | CCGCCAACAAATCCCCAGGACACCGCGTGTTCCTCCGGGAGCCCCGGGTTCGCGGACCAACC | 300 |
| JN420339.1  | CCGCCAACAAATCCCCAGGACACCGCGTGTTCCTCCGGGAGCCCCGGGTTCGCGGACCAACC | 300 |
| MN159383.1  | CCACCAACAATCCCCAGGACACCGCGTGTTCCTCCGGGAGCCCCGGGTTCGCGGACCAACC  | 300 |
| JN420337.1  | CCACCAACAATCCCCAGGACACCGCGTGTTCCTCCGGGAGCCCCGGGTTCGCGGACCAACC  | 300 |
| JN420338.1  | CCGCCAACAAATCCCCAGGACACCGCGTGTTCCTCCGGGAGCCCCGGGTTCGCGGACCAACC | 300 |
| MH160388.1  | CCGCCAACAAATCCCCAGGACACCGCGTGTTCCTCCGGGAGCCCCGGGTTCGCGGACCAACC | 300 |
|             | * * * * *                                                      |     |
| NC_001806.2 | CGAGAACCTAGGGAACCCAGAGTACCGCGAGCTCCAGAGACCCAGGGTACCGCGTGAC     | 360 |
| X02138.1    | CGAGAACCTAGGGAACCCAGAGTACCGCGAGCTCCAGAGACCCAGGGTACCGCGTGAC     | 360 |
| MH319852.1  | CGAGAACCTAGGGAACCCAGAGTACCGCGAGCTCCAGAGACCCAGGGTACCGCGTGAC     | 360 |
| OP297873.1  | CGAGAACCTAGGGAACCCAGAGTACCGCGAGCTCCAGAGACCCAGGGTACCGCGTGAC     | 360 |
| KR011283.1  | CGAGAACCTAGGGAACCCAGAGTACCGCGAGCTCCAGAGACCCAGGGTACCGCGTGAC     | 360 |
| X14112.1    | CGAGAACCTAGGGAACCCAGAGTACCGCGAGCTCCAGAGACCCAGGGTACCGCGTGAC     | 360 |
| KR011281.1  | CGAGAACCTAGGGAACCCAGAGTACCGCGAGCTCCAGAGACCCAGGGTACCGCGTGAC     | 360 |
| MG646679.1  | CGAGAACCTAGGGAACCCAGAGTACCGCGAGCTCCAGAGACCCAGGGTACCGCGTGAC     | 360 |
| OP297879.1  | CGAGAACCTAGGGAACCCAGAGTACCGCGAGCTCCAGAGACCCAGGGTACCGCGTGAC     | 360 |
| MH160384.1  | CGAGAACCTAGGGAACCCAGAGTACCGCGAGCTCCAGAGACCCAGGGTACCGCGTGAC     | 360 |
| JN420342.2  | CGAGAACCTAGGGAACCCAGAGTACCGCGAGCTCCAGAGACCCAGGGTACCGCGTGAC     | 360 |
| MG999890.1  | CGAGAACCTAGGGAACCCAGAGTACCGCGAGCTCCAGAGACCCAGGGTACCGCGTGAC     | 360 |
| MG999850.1  | CGAGAACCTAGGGAACCCAGAGTACCGCGAGCTCCAGAGACCCAGGGTACCGCGTGAC     | 360 |
| MH999848.1  | CGAGAACCTAGGGAACCCAGAGTACCGCGAGCTCCAGAGACCCAGGGTACCGCGTGAC     | 360 |
| MH160390.1  | CGAGAACCTAGGGAACCCAGAGTACCGCGAGCTCCAGAGACCCAGGGTACCGCGTGAC     | 360 |
| GU734772.1  | CGAGAACCTAGGGAACCCAGAGTACCGCGAGCTCCAGAGACCCAGGGTACCGCGTGAC     | 360 |
| MG999839.1  | CGAGAACCTAGGGAACCCAGAGTACCGCGAGCTCCAGAGACCCAGGGTACCGCGTGAC     | 360 |
| JN420341.1  | CGAGAACCTAGGGAACCCAGAGTACCGCGAGCTCCAGAGACCCAGGGTACCGCGTGAC     | 360 |
| JN400093.1  | CGAGAACCTAGGGAACCCAGAGTACCGCGAGCTCCAGAGACCCAGGGTACCGCGTGAC     | 360 |
| MG999872.1  | CGAGAACCTAGGGAACCCAGAGTACCGCGAGCTTCCAGAGACCCAGGGTACCGCGTGAC    | 360 |
| JN420340.1  | CGAGAACCTAGGGAACCCAGAGTACCGCGAGCTCCAGAGACCCAGGGTACCGCGTGAC     | 360 |
| JN420339.1  | CGAGAACCTAGGGAACCCAGAGTACCGCGAGCTCCAGAGACCCAGGGTACCGCGTGAC     | 360 |
| MN159383.1  | CGAGAACCTAGGGAACCCAGAGTACCGCGAGCTTCCAGAGACCCAGGGTACCGCGTGAC    | 360 |
| JN420337.1  | CGAGAACCTAGGGAACCCAGAGTACCGCGAGCTTCCAGAGACCCAGGGTACCGCGTGAC    | 360 |
| JN420338.1  | CGAGAACCTAGGGAACCCAGAGTACCGCGAGCTCCAGAGACCCAGGGTACCGCGTGAC     | 360 |
| MH160388.1  | CGAGAACCTAGGGAACCCAGAGTACCGCGAGCTCCAGAGACCCAGGGTACCGCGTGAC     | 360 |
|             | * * * * *                                                      |     |

|             |                                                             |     |
|-------------|-------------------------------------------------------------|-----|
| NC_001806.2 | CCCAGGGATCCACGACAACCCCGGTCTCCAGGGAGCCCCGGTCTCCCCGGGAGCCCCGG | 420 |
| X02138.1    | CCCAGGGATCCACGACAACCCCGGTCTCCAGGGAGCCCCGGTCTCCCCGGGAGCCCCGG | 420 |
| MH319852.1  | CCCAGGGATCCACGACAACCCCGGTCTCCAGGGAGCCCCGGTCTCCCCGGGAGCCCCGG | 420 |
| OP297873.1  | CCCAGGGATCCACGACAACCCCGGTCTCCAGGGAGCCCCGGTCTCCCCGGGAGCCCCGG | 420 |
| KR011283.1  | CCCAGGGATCCACGACAACCCCGGTCTCCAGGGAGCCCCGGTCTCCCCGGGAGCCCCGG | 420 |
| X14112.1    | CCCAGGGATCCACGACAACCCCGGTCTCCAGGGAGCCCCGGTCTCCCCGGGAGCCCCGG | 420 |
| KR011281.1  | CCCAGGGATCCACGACAACCCCGGTCTCCAGGGAGCCCCGGTCTCCCCGGGAGCCCCGG | 420 |
| MG646679.1  | CCCAGGGATCCACGACAACCCCGGTCTCCAGGGAGCCCCGGTCTCCAGGGAGCCCCGG  | 420 |
| OP297879.1  | CCCAGGGATCCACGACAACCCCGGTCTCCAGGGAGCCCCGGTCTCCAGGGAGCCCCGG  | 420 |
| MH160384.1  | CCCAGGGATCCACGACAACCCCGGTCTCCAGGGAGCCCCGGTCTCCAGGGAGCCCCGG  | 420 |
| JN420342.2  | CCCAGGGATCCACGACAACCCCGGTCTCCAGGGAGCCCCGGTCTCCAGGGAGCCCCGG  | 420 |
| MG999890.1  | CCCAGGGATCCACGACAACCCCGGTCTCCAGGGAGCCCCGGTCTCCCCGGGAGCCCCGG | 420 |
| MG999850.1  | CCCAGGGATCCACGACAACCCCGGTCTCCAGGGAGCCCCGGTCTCCAGGGAGCCCCGG  | 420 |
| MH999848.1  | CCCAGGGATCCACGACAACCCCGGTCTCCAGGGAGCCCCGGTCTCCAGGGAGCCCCGG  | 420 |
| MH160390.1  | CCCAGGGATCCACGACAACCCCGGTCTCCAGGGAGCCCCGGTCTCCAGGGAGCCCCGG  | 420 |
| GU734772.1  | CCCAGGGATCCACGACAACCCCGGTCTCCAGGGAGCCCCGGTCTCCCCGGGAGCCCCGG | 420 |
| MG999839.1  | CCCAGGGATCCACGACAACCCCGGTCTCCAGGGAGCCCCGGTCTCCCCGGGAGCCCCGG | 420 |
| JN420341.1  | CCCAGGGATCCACGACAACCCCGGTCTCCAGGGAGCCCCGGTCTCCCCGGGAGCCCCGG | 420 |
| JN400093.1  | CCCAGGGATCCACGACAACCCCGGTCTCCAGGGAGCCCCGACATCCCCGGGAGCCCCGG | 420 |
| MG999872.1  | CCCAGGGATCCACGACAGCCCCGGTCTCCAGGGAGCCCCGGTCTCCAGGGAGCCCCGG  | 420 |
| JN420340.1  | CCCAGGGATCCACGACAACCCCGGTCTCCAGGGAGCCACGACAACCCCGGGAGCCCCGG | 420 |
| JN420339.1  | CCCAGGGATCCACGACAACCCCGGTCTCCAGGGAGCCACGACAACCCCGGGAGCCCCGG | 420 |
| MN159383.1  | CCCAGGGATCCACGACAGCCCCGGTCTCCAGGGAGCCCCGGCTCCCCGGGAGCCACGG  | 420 |
| JN420337.1  | CCCAGGGATCCACGACAGCCCCGGTCTCCAGGGAGCCCCGGTCTCCAGGGAGCCCCGG  | 420 |
| JN420338.1  | CCCAGGGATCCACGACAACCCCGGGCCCCAGGGAGCCACGACAACCCCGGGAGCCCCGG | 420 |
| MH160388.1  | CCCAGGGATCCAGAGACCCAGGGCTCCAGAGACCCAGTGACCCAGGAGACCCCGG     | 420 |
|             | ***** ** * * * * * * * * * * * * * * * * * * * * * *        |     |
| NC_001806.2 | TCTCCCCGGGAGCCCCGGACCCACGCACCCCCCGCGAACCAGTACGGCTCGCGGGTCT  | 480 |
| X02138.1    | TCTCCCCGGGAGCCCCGGACCCACGCACCCCCCGCGAACCAGTACGGCTCGCGGGTCT  | 480 |
| MH319852.1  | TCTCCCCGGGAGCCCCGGACCCACGCACCCCCCGCGAACCAGTACGGCTCGCGGGTCT  | 480 |
| OP297873.1  | TCTCCCCGGGAGCCCCGGACCCACGCACCCCCCGCGAACCAGTACGGCTCGCGGGTCT  | 480 |
| KR011283.1  | TCTCCCCGGGAGCCCCGGACCCACGCACCCCCCGCGAACCAGTACGGCTCGCGGGTCT  | 480 |
| X14112.1    | TCTCCCCGGGAGCCCCGGACCCACGCACCCCCCGCGAACCAGTACGGCTCGCGGGTCT  | 480 |
| KR011281.1  | TCTCCCCGGGAGCCCCGGACCCACGCACCCCCCGCGAACCAGTACGGCTCGCGGGTCT  | 480 |
| MG646679.1  | TCTCCCCGGGAGCCCCGGACCCACGCACCCCCCGCGAACCAGTACGGCTCGCGGGTCT  | 480 |
| OP297879.1  | TCTCCCCGGGAGCCCCGGACCCACGCACCCCCCGCGAACCAGTACGGCTCGCGGGTCT  | 480 |
| MH160384.1  | TCTCCCCGGGAGCCCCGGACCCACGCACCCCCCGCGAACCAGTACGGCTCGCGGGTCT  | 480 |
| JN420342.2  | TCTCCCCGGGAGCCCCGGACCCACGCACCCCCCGCGAACCAGTACGGCTCGCGGGTCT  | 480 |
| MG999890.1  | TCTCCCCGGGAGCCCCGGACCCACGCACCCCCCGCGAACCAGTACGGCTCGCGGGTCT  | 480 |
| MG999850.1  | TCTCCCCGGGAGCCCCGGACCCACGCACCCCCCGCGAACCAGTACGGCTCGCGGGTCT  | 480 |
| MH999848.1  | TCTCCCCGGGAGCCCCGGACCCACGCACCCCCCGCGAACCAGTACGGCTCGCGGGTCT  | 480 |
| MH160390.1  | TCTCCCCGGGAGCCCCGGACCCACGCACCCCCCGCGAACCAGTACGGCTCGCGGGTCT  | 480 |
| GU734772.1  | TGCTCCAGGGAGCCCCGGACCCACGCACCCCCCGCGAACCAGTACGGCTCGCGGGTCT  | 480 |
| MG999839.1  | TCTCCCCGGGAGCCCCGGACCCACGCACCCCCCGCGAACCAGTACGGCTCGCGGGTCT  | 480 |
| JN420341.1  | CATCCCCGGGAGCCCCGGACCCACGCACCCCCCGCGAACCAGTACGGCTCGCGGGTCT  | 480 |
| JN400093.1  | CCTCCCCGGGAGCCCCGGACCCACGCACCCCCCGCGAACCAGTACGGCTCGCGGGTCT  | 480 |
| MG999872.1  | CCTCCCCGGGAGCCCCGGACCCACGCACCCCCCGCGAACCAGTACGGCTCGCGGGTCT  | 480 |
| JN420340.1  | CCTCCCCGGGAGCCCCGGACCCACGCACCCCCCGCGAACCAGTACGGCTCGCGGGTCT  | 480 |
| JN420339.1  | CCTCCCCGGGAGCCCCGGACCCACGCACCCCCCGCGAACCAGTACGGCTCGCGGGTCT  | 480 |
| MN159383.1  | TCTCCCCGGGAGCCCCGGACCCACGCACCCCCCGCGAACCAGTACGGCTCGCGGGTCT  | 480 |
| JN420337.1  | TCTCCAGGGAGCCCGGACCCACGCACCCCCCGCGAACCAGTACGGCTCGCGGGTCT    | 480 |
| JN420338.1  | CCTCCCCGGGAGCCCCGGACCCACGCACCCCCCGCGAACCAGTACGGCTCGCGGGTCT  | 480 |
| MH160388.1  | TCTCCAGGGAGCCCGGACCCACGCACCCCCCGCGAACCAGTACGGCTCGCGGGTCT    | 480 |
|             | *****                                                       |     |

|             |        |     |
|-------------|--------|-----|
| NC_001806.2 | GTATAG | 486 |
| X02138.1    | GTATAG | 486 |
| MH319852.1  | GTATAG | 486 |
| OP297873.1  | GTATAG | 486 |
| KR011283.1  | GTATAG | 486 |
| X14112.1    | GTATAG | 486 |
| KR011281.1  | GTATAG | 486 |
| MG646679.1  | GTATAG | 486 |
| OP297879.1  | GTATAG | 486 |
| MH160384.1  | GTATAG | 486 |
| JN420342.2  | GTATAG | 486 |
| MG999890.1  | GTATAG | 486 |
| MG999850.1  | GTATAG | 486 |
| MH999848.1  | GTATAG | 486 |
| MH160390.1  | GTATAG | 486 |
| GU734772.1  | GTATAG | 486 |
| MG999839.1  | GTATAG | 486 |
| JN420341.1  | GTATAG | 486 |
| JN400093.1  | GTATAG | 486 |
| MG999872.1  | GTATAG | 486 |
| JN420340.1  | GTATAG | 486 |
| JN420339.1  | GTATAG | 486 |
| MN159383.1  | GTATAG | 486 |
| JN420337.1  | GTATAG | 486 |
| JN420338.1  | GTATAG | 486 |
| MH160388.1  | GTATAG | 486 |
| *****       |        |     |
