# Supplementary material for: Discovery of a Novel Intron in US10/US11/US12 of HSV-1 Strain 17
Source: MDPI journal article supplement (doi:10.3390/v15112144), 2023-10-25
Supplement: s1 [file s1]

# Supplemental Data S6: Alignment of the HSV-1 US11 Gene Non Multiple 9 nt shorter Than US11 Gene in HSV-1 Strain 17

|             |                                                              |     |
|-------------|--------------------------------------------------------------|-----|
| NC_001806.2 | ATGAGCCAGACCCAACCCCGGCCCCAGTTGGGCCGGGCGACCCAGATGTTTACTTAAAA  | 60  |
| MH160377.1  | ATGAGCCAGACCCAACCCCGGCCCCAGTTGGGCCGGGCGACCCAGATGTTTACTTAAAA  | 60  |
| MG999862.1  | ATGAGCCAGACCCAACCCCGGCCCCAGTTGGGCCGGGCGACCCAGATGTTTACTTAAAA  | 60  |
| MG999868.1  | ATGAGCCAGACCCAACCCCGGCCCCAGTTGGGCCGGGCGACCCAGATGTTTACTTAAAA  | 60  |
| MG999884.1  | ATGAGCCAGACCCAACCCCGGCCCCAGTTGGGCCGGGCGACCCAGATGTTTACTTAAAA  | 60  |
| *****       |                                                              |     |
| NC_001806.2 | GGCGTGCCGTCCGCCGGCATGCACCCAGAGGTGTTACGCACCTCGAGGACACCCGCGC   | 120 |
| MH160377.1  | GGCGTGCCGTCCGCCGGCATGCACCCAGAGGTGTTACGCACCTCGAGGACACCCGCGC   | 120 |
| MG999862.1  | GGCGTGCCGTCCGCCGGCATGCACCCAGAGGTGTTACGCACCTCGAGGACACCCGCGC   | 120 |
| MG999868.1  | GGCGTGCCGTCCGCCGGCATGCACCCAGAGGTGTTACGCACCTCGAGGACACCCGCGC   | 120 |
| MG999884.1  | GGCGTGCCGTCCGCCGGCATGCACCCAGAGGTGTTACGCACCTCGAGGACACCCGCGC   | 120 |
| *****       |                                                              |     |
| NC_001806.2 | ATGATCTCCGACCCCGCAACGGGGTGATAATGATCAAGCGCGGGGCAATGTGGAGAT    | 180 |
| MH160377.1  | ATGATCTCCGACCCCGCAACGGGGTGATAATGATCAAGCGCGGGGCAATGTGGAGAT    | 180 |
| MG999862.1  | ATGATCTCCGACCCCGCAACGGGGTGATAATGATCAAGCGCGGGGCAATGTGGAGAT    | 180 |
| MG999868.1  | ATGATCTCCGACCCCGCAACGGGGTGATAATGATCAAGCGCGGGGCAATGTGGAGAT    | 180 |
| MG999884.1  | ATGATCTCCGATCCCGCAACGGGGTGATAATGATCAAGCGCGGGGCAATGTGGAGAT    | 180 |
| *****       |                                                              |     |
| NC_001806.2 | TCGGGTCTACTACGAGTCGGTGCGGACACTACGATCTCGAAGCCATCTGAAGCCGTCCGA | 240 |
| MH160377.1  | TCGGGTCTACTACGAGTCGGTGCGGACACTACGATCTCGAAGCCATCTGAAGCCGTCCGA | 240 |
| MG999862.1  | TCGGGTCTACTACGAGTCGGTGCGGACACTACGATCTCGAAGCCATCTGAAGCCGTCCGA | 240 |
| MG999868.1  | TCGGGTCTACTACGAGTCGGTGCGGACACTACGATCTCGAAGCCATCTGAAGCCGTCCGA | 240 |
| MG999884.1  | TCGGGTCTACTACGAGTCGGTGCGGACACTACGATCTCGAAGCCATCTGAAGCCGTCCGA | 240 |
| *****       |                                                              |     |
| NC_001806.2 | CCGCCAACCAATCCCCAGGACACCGCGTGTCCCCGGGAGCCCCGGGTTCGCGACCAACC  | 300 |
| MH160377.1  | CCGCCAACCAATCCCCAGGACACCGCGTGTCCCCGGGAGCCCCGGGTTCGCGACCAACC  | 300 |
| MG999862.1  | CCGCCAACCAATCCCCAGGACACCGCGTGTCCCCGGGAGCCCCGGGTTCGCGACCAACC  | 300 |
| MG999868.1  | CCGCCAACCAATCCCCAGGACACCGCGTGTCCCCGGGAGCCCCGGGTTCGCGACCAACC  | 300 |
| MG999884.1  | CCGCCAACCAATCCCCAGGACACCGCGTGTCCCCGGGAGCCCCGGGTTCGCGACCAACC  | 300 |
| *****       |                                                              |     |
| NC_001806.2 | CGAGAACCTAGGGAACCCAGAGTACCGCGAGCTCCAGAGACCCAGGGTACCGCGTGAC   | 360 |
| MH160377.1  | CGAGAACCTAGGGAACCCAGAGTACCGCGAGCTCCAGAGACCCAGGGTACCGCGTGAC   | 360 |
| MG999862.1  | CGAGAACCTAGGGAACCCAGAGTACCGCGAGCTCCAGAGACCCAGGGTACCGCGTGAC   | 360 |
| MG999868.1  | CGAGAACCTAGGGAACCCAGAGTACCGCGAGCTCCAGAGACCCAGGGTACCGCGTGAC   | 360 |
| MG999884.1  | CGAGAACCTAGGGAACCCAGAGTACCGCGAGCTCCAGAGACCCAGGGTACCGCGTGAC   | 360 |
| *****       |                                                              |     |
| NC_001806.2 | CCCAGGGATCCACGACAACCCCGGTCTCCAGGGAGCCCCGGTCTCCCGGGAGCCCCGG   | 420 |
| MH160377.1  | CCCAGGGATCCACGACAACCCCGGC-----CCCGGGAGCCCCGG                 | 399 |
| MG999862.1  | CCCAGGGATCCACGACAACCCCGGC-----CCCGGGAGCCCCGG                 | 399 |
| MG999868.1  | CCCAGGGATCCACGACAACCCCGGC-----GGGAGCCCCGG                    | 396 |
| MG999884.1  | CCCAGGGATCCACGACAACCCCGGC-----CCCGGGAGCCCCGG                 | 399 |
| *****       |                                                              |     |
| NC_001806.2 | TCTCCCCGGGAGCCCCGGACCCACGCACCCCCCGGAACACGTACGGCTCGCGGGTCT    | 480 |
| MH160377.1  | CCTCCCCGGGAGCCCCGGACCCACGCACCCCCCGGAACACGTACGGCTCGCGGGTCT    | 459 |
| MG999862.1  | CCTCCCCGGGAGCCCCGGACCCACGCACCCCCCGGAACACGTACGGCTCGCGGGTCT    | 459 |
| MG999868.1  | CCTCCCCGGGAGCCCCGGACCCACGCACCCCCCGGAACACGTACGGCTCGCGGGTCT    | 456 |
| MG999884.1  | CCTCCCCGGGAGCCCCGGACCCACGCACCCCCCGGAACACGTACGGCTCGCGGGTCT    | 459 |
| *****       |                                                              |     |
| NC_001806.2 | GTATAG                                                       | 486 |
| MH160377.1  | GTATAG                                                       | 465 |
| MG999862.1  | GTATAG                                                       | 465 |
| MG999868.1  | GTATAG                                                       | 462 |
| MG999884.1  | GTATAG                                                       | 465 |
| *****       |                                                              |     |
