# Supplementary material for: Discovery of a Novel Intron in US10/US11/US12 of HSV-1 Strain 17
Source: MDPI journal article supplement (doi:10.3390/v15112144), 2023-10-25
Supplement: s1 [file s1]

## Supplemental Data S5: Alignment of the HSV-1 US11 Gene with the Length of Multiple 9 nt Longer Than HSV-1 Strain 17

|             |                                                               |     |
|-------------|---------------------------------------------------------------|-----|
| NC_001806.2 | ATGAGCCAGACCCAACCCCGGCCCCAGTTGGGCCGGGCGACCCAGATGTTTACTTAAAA   | 60  |
| OP297870.1  | ATGAGCCAGACCCAACCCCGGCCCCAGTTGGGCCGGGCGACCCAGATGTTTACTTAAAA   | 60  |
| OQ102003.1  | ATGAGCCAGACCCAACCCCGGCCCCAGTTGGGCCGGGCGACCCAGATGTTTCTTAAAA    | 60  |
| HM585510.2  | ATGAGCCAGACCCAACCCCGGCCCCAGTTGGGCCGGGCGACCCAGATGTTTACTTAAAA   | 60  |
|             | *****                                                         |     |
| NC_001806.2 | GGCGTGCCGTCCGCCGGCATGCACCCAGAGGTGTTACGCACCTCGAGGACACCCGCGC    | 120 |
| OP297870.1  | GGCGTGCCGTCCGCCGGCATGCACCCAGAGGTGTTACGCACCTCGAGGACACCCGCGC    | 120 |
| OQ102003.1  | GGCGCGCCGTCCACCGCATGCACCCAGAGGTGTTACGCACCTCGAGGACACCCGCGC     | 120 |
| HM585510.2  | GGCGTGCCGTCCGCCGGCATGCACCCAGAGGTGTTACGCACCTCGAGGACACCCGCGC    | 120 |
|             | **** *****                                                    |     |
| NC_001806.2 | ATGATCTCCGACCCCCGCAACGGGGTGATAATGATCAAGCGGCGGGGCAATGTGGAGAT   | 180 |
| OP297870.1  | ATGATCTCCGACCCCCGCAACGGGGTGATAATGATCAAGCGGCGGGGCAATGTGGAGAT   | 180 |
| OQ102003.1  | ATGATCTCCGACCCCCGCAACGGGGTGATAATGATCAAGCGGCGGGGCAATGTGGAGAT   | 180 |
| HM585510.2  | ATGATCTCCGACCCCCGCAACGGGGTGATAATGATCAAGCGGCGGGGCAATGTGGAGAT   | 180 |
|             | *****                                                         |     |
| NC_001806.2 | TCGGGTCTACTACGAGTCGGTGCGGACACTACGATCTCGAAGCCATCTGAAGCCGTCCGA  | 240 |
| OP297870.1  | TCGGGTCTACTACGAGTCGGTGCGGACACTACGATCTCGAAGCCATCTGAAGCCGTCCGA  | 240 |
| OQ102003.1  | TCGGGTCTACTACGAGTCGGTGCGGACACTACGATCTCGAAGCCATCTGAAGCCGTCCGA  | 240 |
| HM585510.2  | TCGGGTCTACTACGAGTCGGTGCGGACACTACGATCTCGAAGCCATCTGAAGCCGTCCGA  | 240 |
|             | *****                                                         |     |
| NC_001806.2 | CCGCCAACAAATCCCCAGGACACCGCGTGTTCGCCGGGAGCCCCGGGTTCCGCGACCAACC | 300 |
| OP297870.1  | CCGCCAACAAATCCCCAGGACACCGCGTGTTCGCCGGGAGCCCCGGGTTCCGCGACCAACC | 300 |
| OQ102003.1  | CCGCCAACAAATCCCCAGGACGCGCGTGTTCGCCGGGAGCCCCGGGTTCCGCGACCAACC  | 300 |
| HM585510.2  | CCGCCAACAAATCCCCAGGACGCGCGTGTTCGCCGGGAGCCCCGGGTTCCGCGACCAACC  | 300 |
|             | ***** *****                                                   |     |
| NC_001806.2 | CGAGAACCTAGGGAACCCAGAGTACCGCGAGCTCCAGAGACCCAGGGTACCGCGTGAC    | 360 |
| OP297870.1  | CGAGAACCTAGGGAACCCAGAGTACCGCGAGCTCCAGAGACCCAGGGTACCGCGTGAC    | 360 |
| OQ102003.1  | CGAGAACCTAGGGAACCCAGAGTACCGCGAGCTCCAGAGACCCAGGGTACCGCGTGAC    | 360 |
| HM585510.2  | CGAGAACCTAGGGAACCCAGAGTACCGCGAGCTCCAGAGACCCAGGGTCCCGCGTGAC    | 360 |
|             | *****                                                         |     |
| NC_001806.2 | CCCAGGGATCCACGACAACCCCGGTCTCCCAGGGAGCCCCGGTCTCC-----CCGG      | 411 |
| OP297870.1  | CCCAGGGATCCACGACAACCCCGGGAGCCCCGGCCTCCCAGGGAGCCCCGGCCTCCCCGG  | 420 |
| OQ102003.1  | CCCAGGGATCCACGACAGTCCCGGTCTCCCAGGGAGCCCCGGGATCCACGACGCCCCGC   | 420 |
| HM585510.2  | CCCAGGGATCCACGACAACCCCGGGAGCCCCGGCCTCCCAGGGATCCACGACAACCCCGG  | 420 |
|             | ***** **** * * ***** **                                       |     |
| NC_001806.2 | GAG-----CCCCGGTCTCCC <b>CGGG</b> AGCCCCGACCCACGCACCCCC        | 453 |
| OP297870.1  | GAG-----CCCCGGCCTCCCAGGGAGCCCCGACCCACGCACCCCC                 | 462 |
| OQ102003.1  | GAACCACGACAG-----CCCCGGTCTCCCAGGGAGCCCCGGGATCCACGACGCCCC      | 471 |
| HM585510.2  | GAGCCCCGGCCTCCCAGGGATCCACGACAACCCCGGGAGCCCCGACCCACGCACCCCC    | 480 |
|             | ** * *****                                                    |     |
| NC_001806.2 | CGCGAACCACGTACGGCTCGCGGGTCTGTATAG                             | 486 |
| OP297870.1  | CGCGAACCACGTACGGCTCGCGGGTCTGTATAG                             | 495 |
| OQ102003.1  | CGCGAACCACGGACGGCTCGCGGGTCTGTATAG                             | 504 |
| HM585510.2  | CGCGAACCACGTACGGCTCGCGGGTCTGTATAG                             | 513 |
|             | *****                                                         |     |
