# Supplementary material for: Discovery of a Novel Intron in US10/US11/US12 of HSV-1 Strain 17
Source: MDPI journal article supplement (doi:10.3390/v15112144), 2023-10-25
Supplement: s1 [file s1]

# Supplemental Data S3: Alignment of the HSV-1 US11 Gene 9 nt Shorter Than HSV-1 Strain 17

|             |                                                               |     |
|-------------|---------------------------------------------------------------|-----|
| NC_001806.2 | ATGAGCCAGACCCAACCCCGGCCCCAGTTGGGCCGGGCGACCCAGATGTTTACTTAAAA   | 60  |
| OP297871.1  | ATGAGCCAGACCCAACCCCGGCCCCAGTTGGGCCGGGCGACCCAGATGTTTACTTAAAA   | 60  |
| OQ658624.1  | ATGAGCCAGACCCAACCCCGGCCCCAGTTGGGCCGGGCGACCCAGATGTTTACTTAAAA   | 60  |
| MH160371.1  | ATGAGCCAGACCCAACCCCGGCCCCAGTTGGGCCGGGCGACCCAGATGTTTACTTAAAA   | 60  |
| HM585507.2  | ATGAGCCAGACCCAACCCCGGCCCCAGTTGGGCCGGGCGACCCAGATGTTTACTTAAAA   | 60  |
| HM585501.2  | ATGAGCCAGACCCAACCCCGGCCCCAGTTGGGCCGGGCGACCCAGATGTTTACTTAAAA   | 60  |
| HM585503.2  | ATGAGCCAGACCCAACCCCGGCCCCAGTTGGGCCGGGCGACCCAGATGTTTACTTAAAA   | 60  |
| HM585505.2  | ATGAGCCAGACCCAACCCCGGCCCCAGTTGGGCCGGGCGACCCAGATGTTTACTTAAAA   | 60  |
| *****       |                                                               |     |
| NC_001806.2 | GGCGTGCCGTCCGCCGGCATGCACCCAGAGGTGTTACGCACCTCGAGGACACCCGCGC    | 120 |
| OP297871.1  | GGCGTGCCGTCCGCCGGCATGCACCCAGAGGTGTTACGCACCTCGAGGACACCCGCGC    | 120 |
| OQ658624.1  | GGCGTGCCGTCCGCCGGCATGCACCCAGAGGTGTTACGCACCTCGAGGACACCCGCGC    | 120 |
| MH160371.1  | GGCGTGCCGTCCGCCGGCATGCACCCAGAGGTGTTACGCACCTCGAGGACACCCGCGC    | 120 |
| HM585507.2  | GGCGTGCCGTCCGCCGGCATGCACCCAGAGGTGTTACGCACCTCGAGGACACCCGCGC    | 120 |
| HM585501.2  | GGCGTGCCGTCCGCCGGCATGCACCCAGAGGTGTTACGCACCTCGAGGACACCCGCGC    | 120 |
| HM585503.2  | GGCGTGCCGTCCGCCGGCATGCACCCAGAGGTGTTACGCACCTCGAGGACACCCGCGC    | 120 |
| HM585505.2  | GGCGTGCCGTCCGCCGGCATGCACCCAGAGGTGTTACGCACCTCGAGGACACCCGCGC    | 120 |
| *****       |                                                               |     |
| NC_001806.2 | ATGATCTCCGGACCCCCGCAACGGGGTGATAATGATCAAGCGGCGGGGCAATGTGGAGAT  | 180 |
| OP297871.1  | ATGATCTCCGGACCCCCGCAACGGGGTGATAATGATCAAGCGGCGGGGCAATGTGGAGAT  | 180 |
| OQ658624.1  | ATGATCTCCGGACCCCCGCAACGGGGTGATAATGATCAAGCGGCGGGGCAATGTGGAGAT  | 180 |
| MH160371.1  | ATGATCTCCGGACCCCCGCAACGGGGTGATAATGATCAAGCGGCGGGGCAATGTGGAGAT  | 180 |
| HM585507.2  | ATGATCTCCGGACCCCCGCAACGGGGTGATAATGATCAAGCGGCGGGGCAATGTGGAGAT  | 180 |
| HM585501.2  | ATGATCTCCGGACCCCCGCAACGGGGTGATAATGATCAAGCGGCGGGGCAATGTGGAGAT  | 180 |
| HM585503.2  | ATGATCTCCGGACCCCCGCAACGGGGTGATAATGATCAAGCGGCGGGGCAATGTGGAGAT  | 180 |
| HM585505.2  | ATGATCTCCGGACCCCCGCAACGGGGTGATAATGATCAAGCGGCGGGGCAATGTGGAGAT  | 180 |
| *****       |                                                               |     |
| NC_001806.2 | TCGGGTCTACTACGAGTCGGTGCGGACACTACGATCTCGAAGCCATCTGAAGCCGTCCGA  | 240 |
| OP297871.1  | TCGGGTCTACTACGAGTCGGTGCGGACACTACGATCTCGAAGCCATCTGAAGCCGTCCGA  | 240 |
| OQ658624.1  | TCGGGTCTACTACGAGTCGGTGCGGACACTACGATCTCGAAGCCATCTGAAGCCGTCCGA  | 240 |
| MH160371.1  | TCGGGTCTACTACGAGTCGGTGCGGACACTACGATCTCGAAGCCATCTGAAGCCGTCCGA  | 240 |
| HM585507.2  | TCGGGTCTACTACGAGTCGGTGCGGACACTACGATCTCGAAGCCATCTGAAGCCGTCCGA  | 240 |
| HM585501.2  | TCGGGTCTACTACGAGTCGGTGCGGACACTACGATCTCGAAGCCATCTGAAGCCGTCCGA  | 240 |
| HM585503.2  | TCGGGTCTACTACGAGTCGGTGCGGACACTACGATCTCGAAGCCATCTGAAGCCGTCCGA  | 240 |
| HM585505.2  | TCGGGTCTACTACGAGTCGGTGCGGACACTACGATCTCGAAGCCATCTGAAGCCGTCCGA  | 240 |
| *****       |                                                               |     |
| NC_001806.2 | CCGCCAACAAATCCCCAGGACACCGCGTGTTCGCCGGGAGCCCCGGGTTCGCGGACCAACC | 300 |
| OP297871.1  | CCGCCAACAAATCCCCAGGACACCGCGTGTTCGCCGGGAGCCCCGGGTTCGCGGACCAACC | 300 |
| OQ658624.1  | CCGCCAACAAATCCCCAGGACACCGCGTGTTCGCCGGGAGCCCCGGGTTCGCGGACCAACC | 300 |
| MH160371.1  | CCGCCAACAAATCCCCAGGACACCGCGTGTTCGCCGGGAGCCCCGGGTTCGCGGACCAACC | 300 |
| HM585507.2  | CCGCCAACAAATCCCCAGGACACCGCGTGTTCGCCGGGAGCCCCGGGTTCGCGGACCAACC | 300 |
| HM585501.2  | CCGCCAACAAATCCCCAGGACACCGCGTGTTCGCCGGGAGCCCCGGGTTCGCGGACCAACC | 300 |
| HM585503.2  | CCGCCAACAAATCCCCAGGACACCGCGTGTTCGCCGGGAGCCCCGGGTTCGCGGACCAACC | 300 |
| HM585505.2  | CCGCCAACAAATCCCCAGGACACCGCGTGTTCGCCGGGAGCCCCGGGTTCGCGGACCAACC | 300 |
| *****       |                                                               |     |
| NC_001806.2 | CGAGAACCTAGGGAACCCAGAGTACCGCGAGCTCCAGAGACCCAGGGTACCGCGTGAC    | 360 |
| OP297871.1  | CGAGAACCTAGGGAACCCAGAGTACCGCGAGCTCCAGAGACCCAGGGTACCGCGTGAC    | 360 |
| OQ658624.1  | CGAGAACCTAGGGAACCCAGAGTACCGCGAGCTCCAGAGACCCAGGGTACCGCGTGAC    | 360 |
| MH160371.1  | CGAGAACCTAGGGAACCCAGAGTACCGCGAGCTCCAGAGACCCAGGGTACCGCGTGAC    | 360 |
| HM585507.2  | CGAGAACCTAGGGAACCCAGAGTACCGCGAGCTCCAGAGACCCAGGGTACCGCGTGAC    | 360 |
| HM585501.2  | CGAGAACCTAGGGAACCCAGAGTACCGCGAGCTCCAGAGACCCAGGGTACCGCGTGAC    | 360 |
| HM585503.2  | CGAGAACCTAGGGAACCCAGAGTACCGCGAGCTCCAGAGACCCAGGGTACCGCGTGAC    | 360 |
| HM585505.2  | CGAGAACCTAGGGAACCCAGAGTACCGCGAGCTCCAGAGACCCAGGGTACCGCGTGAC    | 360 |
| *****       |                                                               |     |

|             |                                                                              |     |
|-------------|------------------------------------------------------------------------------|-----|
| NC_001806.2 | CCCAGGGATCCACGACAACCCCG <b>GT</b> CTCCAGGGAGCCCCGGTCTCC <b>CG</b> GGAGCCCCGG | 420 |
| OP297871.1  | CCCAGGGATCCACGACAACCCCGGGA-----GCCCCGGCCTCCCCGGGAGCCCCGG                     | 411 |
| OQ658624.1  | CCCAGGGATCCACGACAACCCCGGGA-----GCCCCGGCCTCCCCGGGAGCCCCGG                     | 411 |
| MH160371.1  | CCCAGGGATCCACGACAACCCCGGGATCCACGACAA-----CCCCGGGAGCCCCGG                     | 411 |
| HM585507.2  | CCCAGGGATCCACGACAACCCCGGGA-----GCCCCGGCCTCCCCGGGATCCACGA                     | 411 |
| HM585501.2  | CCCAGGGATCCACGACAACCCCGGGA-----GCCCCGGCCTCCCCGGGATCCACGA                     | 411 |
| HM585503.2  | CCCAGGGATCCACGACAACCCCGGGA-----GCCCCGGCCTCCCCGGGATCCACGA                     | 411 |
| HM585505.2  | CCCAGGGATCCACGACAACCCCGGGA-----GCCCCGGCCTCCCCGGGATCCACGA                     | 411 |

\*\*\*\*\*

|             |                                                             |     |
|-------------|-------------------------------------------------------------|-----|
| NC_001806.2 | TCTCCCCGGGAGCCCCGGACCCACGCACCCCCCGCGAACCACGTACGGCTCGCGGGTCT | 480 |
| OP297871.1  | CCTCCCCGGGAGCCCCGGACCCACGCACCCCCCGCGAACCACGTACGGCTCGCGGGTCT | 471 |
| OQ658624.1  | CCTCCCCGGGAGCCCCGGACCCACGCACCCCCCGCGAACCACGTACGGCTCGCGGGTCT | 471 |
| MH160371.1  | CCTCCCCGGGAGCCCCGGACCCACGCACCCCCCGCGAACCACGTACGGCTCGCGGGTCT | 471 |
| HM585507.2  | CAACCCCGGGAGCCCCGGACCCACGCACCCCCCGCGAACCACGTACGGCTCGCGGGTCT | 471 |
| HM585501.2  | CAACCCCGGGAGCCCCGGACCCACGCACCCCCCGCGAACCACGTACGGCTCGCGGGTCT | 471 |
| HM585503.2  | CAACCCCGGGAGCCCCGGACCCACGCACCCCCCGCGAACCACGTACGGCTCGCGGGTCT | 471 |
| HM585505.2  | CAACCCCGGGAGCCCCGGACCCACGCACCCCCCGCGAACCACGTACGGCTCGCGGGTCT | 471 |

\*\*\*\*\*

|             |        |     |
|-------------|--------|-----|
| NC_001806.2 | GTATAG | 486 |
| OP297871.1  | GTATAG | 477 |
| OQ658624.1  | GTATAG | 477 |
| MH160371.1  | GTATAG | 477 |
| HM585507.2  | GTATAG | 477 |
| HM585501.2  | GTATAG | 477 |
| HM585503.2  | GTATAG | 477 |
| HM585505.2  | GTATAG | 477 |

\*\*\*\*\*
