# Supplementary material for: Discovery of a Novel Intron in US10/US11/US12 of HSV-1 Strain 17
Source: MDPI journal article supplement (doi:10.3390/v15112144), 2023-10-25
Supplement: s1 [file s1]

# Supplemental Data S7: Alignment of the HSV-1 US11 Gene Non Multiple 3 nt shorter Than US11 Gene in HSV-1 Strain 17

|             |                                                                |     |
|-------------|----------------------------------------------------------------|-----|
| NC_001806.2 | ATGAGCCAGACCCAACCCCGGCCCCAGTTGGGCCGGGCGACCCAGATGTTTACTTAAAA    | 60  |
| MG999855.1  | ATGAGCCAGACCCAACCCCGGCCCCAGTTGGGCCGGGCGACCCAGATGTTTACTTAAAA    | 60  |
| MG999853.1  | ATGAGCCAGACCCAACCCCGGCCCCAGTTGGGCCGGGCGACCCAGATGTTTACTTAAAA    | 60  |
| MH160367.1  | ATGAGCCAGACCCAACCCCGGCCCCAGTTGGGCCGGGCGACCCAGATGTTTACTTAAAA    | 60  |
|             | *****                                                          |     |
| NC_001806.2 | GGCGTGCCGTCCGCCGGCATGCACCCAGAGGTGTTACGCACCTCGAGGACACCCGCGC     | 120 |
| MG999855.1  | GGCGTGCCGTCCGCCGGCATGCACCCAGAGGTGTTACGCACCTCGAGGACACCCGCGC     | 120 |
| MG999853.1  | GGCGTGCCGTCCGCCGGCATGCACCCAGAGGTGTTACGCACCTCGAGGACACCCGCGC     | 120 |
| MH160367.1  | GGCGTGCCGTCCGCCGGCATGCACCCAGAGGTGTTACGCACCTCGAGGACACCCGCGC     | 120 |
|             | ***** *                                                        |     |
| NC_001806.2 | ATGATCTCCGACCCCCGCAACGGGGTGATAATGATCAAGCGCGGGCAATGTGGAGAT      | 180 |
| MG999855.1  | ATGATCTCCGACCCCCGCAACGGGGTGATAATGATCAAGCGCGGGCAATGTGGAGAT      | 180 |
| MG999853.1  | ATGATCTCCGACCCCCGCAACGGGGTGATAATGATCAAGCGCGGGCAATGTGGAGAT      | 180 |
| MH160367.1  | CTGATCTCCGACCCCCGCAACGGGGTGATAATGATCAAGCGCGGGCAATGTGGAGAT      | 180 |
|             | *****                                                          |     |
| NC_001806.2 | TCGGGTCTACTACGAGTCGGTGCGGACACTACGATCTCGAAGCCATCTGAAGCCGTCCGA   | 240 |
| MG999855.1  | TCGGGTCTACTACGAGTCGGTGCGGACACTACGATCTCGAAGCCATCTGAAGCCGTCCGA   | 240 |
| MG999853.1  | TCGGGTCTACTACGAGTCGGTGCGGACACTACGATCTCGAAGCCATCTGAAGCCGTCCGA   | 240 |
| MH160367.1  | TCGGGTCTACTACGAGTCGGTGCGGACACTACGATCTCGAAGCCATCTGAAGCCGTCCGA   | 240 |
|             | *****                                                          |     |
| NC_001806.2 | CCGCCAACAAATCCCCAGGACACCGCGTGTTCCTCCCGGGAGCCCCGGGTTCGCGACCAACC | 300 |
| MG999855.1  | CCGCCAACAAATCCCCAGGACACCGCGTGTTCCTCCCGGGAGCCCCGGGTTCGCGACCAACC | 300 |
| MG999853.1  | CCGCCAACAAATCCCCAGGACACCGCGTGTTCCTCCCGGGAGCCCCGGGTTCGCGACCAACC | 300 |
| MH160367.1  | CCGCCAACAAATCCCCAGGACACCGCGTGTTCCTCCCGGGAGCCCCGGGTTCGCGACCAACC | 300 |
|             | *****                                                          |     |
| NC_001806.2 | CGAGAACCTAGGGAACCCAGAGTACCGCGAGCTCCAGAGACCCAGGGTACCGCGTGAC     | 360 |
| MG999855.1  | CGAGAACCTAGGGAACCCAGAGTACCGCGAGCTCCAGAGACCCAGGGTACCGCGTGAC     | 360 |
| MG999853.1  | CGAGAACCTAGGGAACCCAGAGTACCGCGAGCTCCAGAGACCCAGGGTACCGCGTGAC     | 360 |
| MH160367.1  | CGAGAACCTAGGGAACCCAGAGTACCGCGAGCTCCAGAGACCCAGGGTACCGCGTGAC     | 360 |
|             | *****                                                          |     |
| NC_001806.2 | CCCAGGGATCCACGACAACCCCGGTCTCCAGGGAGCCCCGGTCTCCCGGGAGCCCCGG     | 420 |
| MG999855.1  | CCCAGGGATCCACGACAACCCCGG-----CCCGGGAGCCCCGG                    | 398 |
| MG999853.1  | CCCAGGGATCCACGACAACCCCGG-----GGGAGCCCCGG                       | 395 |
| MH160367.1  | CCCAGGGATCCACGACAACCCCGG-----CCCGGGAGCCCCGG                    | 397 |
|             | *****                                                          |     |
| NC_001806.2 | TCTCCCCGGGAGCCCCGGACCCACGCACCCCCCGGAACACGTACGGCTCGCGGGTCT      | 480 |
| MG999855.1  | CCTCCCCGGGAGCCCCGGACCCACGCACCCCCCGGAACACGTACGGCTCGCGGGTCT      | 458 |
| MG999853.1  | CCTCCCCGGGAGCCCCGGACCCACGCACCCCCCGGAACACGTACGGCTCGCGGGTCT      | 455 |
| MH160367.1  | CCTCCCCGGGAGCCCCGGACCCACGCACCCCCCGGAACACGTACGGCTCGCGGGTCT      | 457 |
|             | *****                                                          |     |
| NC_001806.2 | GTATAG                                                         | 486 |
| MG999855.1  | GTATAG                                                         | 464 |
| MG999853.1  | GTATAG                                                         | 461 |
| MH160367.1  | GTATAG                                                         | 463 |
|             | *****                                                          |     |
