# Supplementary material for: Discovery of a Novel Intron in US10/US11/US12 of HSV-1 Strain 17
Source: MDPI journal article supplement (doi:10.3390/v15112144), 2023-10-25
Supplement: s1 [file s1]

# Supplemental Data S4: Alignment of the HSV-1 US11 Gene 18 nt Shorter Than HSV-1 Strain 17

|             |                                                              |    |
|-------------|--------------------------------------------------------------|----|
| NC_001806.2 | ATGAGCCAGACCCAAACCCCGGCCCCAGTTGGGCCGGGCGACCCAGATGTTTACTTAAAA | 60 |
| OP297876.1  | ATGAGCCAGACCCAAACCCCGGCCCCAGTTGGGCCGGGCGACCCAGATGTTTACTTAAAA | 60 |
| KT425108.1  | ATGAGCCAGACCCAAACCCCGGCCCCAGTTGGGCCGGGCGACCCAGATGTTTACTTAAAA | 60 |
| OP297880.1  | ATGAGCCAGACCCAAACCCCGGCCCCAGTTGGGCCGGGCGACCCAGATGTTTACTTAAAA | 60 |
| OP297875.1  | ATGAGCCAGACCCAAACCCCGGCCCCAGTTGGGCCGGGCGACCCAGATGTTTACTTAAAA | 60 |
| ON007163.1  | ATGAGCCAGACCCAAACCCCGGCCCCAGTTGGGCCGGGCGACCCAGATGTTTACTTAAAA | 60 |
| ON007155.1  | ATGAGCCAGACCCAAACCCCGGCCCCAGTTGGGCCGGGCGACCCAGATGTTTACTTAAAA | 60 |
| OP297877.1  | ATGAGCCAGACCCAAACCCCGGCCCCAGTTGGGCCGGGCGACCCAGATGTTTACTTAAAA | 60 |
| MN401201.1  | ATGAGCCAGACCCAAACCCCGGCCCCAGTTGGGCCGGGCGACCCAGATGTTTACTTAAAA | 60 |
| ON960054.1  | ATGAGCCAGACCCAAACCCCGGCCCCAGTTGGGCCGGGCGACCCAGATGTTTACTTAAAA | 60 |
| ON007144.1  | ATGAGCCAGACCCAAACCCCGGCCCCAGTTGGGCCGGGCGACCCAGATGTTTACTTAAAA | 60 |
| LT594457.1  | ATGAGCCAGACCCAAACCCCGGCCCCAGTTGGGCCGGGCGACCCAGATGTTTACTTAAAA | 60 |
| LT594122.1  | ATGAGCCAGACCCAAACCCCGGCCCCAGTTGGGCCGGGCGACCCAGATGTTTACTTAAAA | 60 |
| OP297863.1  | ATGAGCCAGACCCAAACCCCGGCCCCAGTTGGGCCGGGCGACCCAGATGTTTACTTAAAA | 60 |
| ON152716.1  | ATGAGCCAGACCCAAACCCCGGCCCCAGTTGGGCCGGGCGACCCAGATGTTTACTTAAAA | 60 |
| MH160374.1  | ATGAGCCAGACCCAAACCCCGGCCCCAGTTGGGCCGGGCGACCCAGATGTTTACTTAAAA | 60 |
| MH999846.1  | ATGAGCCAGACCCAAACCCCGGCCCCAGTTGGGCCGGGCGACCCAGATGTTTACTTAAAA | 60 |
| LT594108.1  | ATGAGCCAGACCCAAACCCCGGCCCCAGTTGGGCCGGGCGACCCAGATGTTTACTTAAAA | 60 |
| MH160373.1  | ATGAGCCAGACCCAAACCCCGGCCCCAGTTGGGCCGGGCGACCCAGATGTTTACTTAAAA | 60 |
| OP297866.1  | ATGAGCCAGACCCAAACCCCGGCCCCAGTTGGGCCGGGCGACCCAGATGTTTACTTAAAA | 60 |
| LT594107.1  | ATGAGCCAGACCCAAACCCCGGCCCCAGTTGGGCCGGGCGACCCAGATGTTTACTTAAAA | 60 |
| MG999856.1  | ATGAGCCAGACCCAAACCCCGGCCCCAGTTGGGCCGGGCGACCCAGATGTTTACTTAAAA | 60 |
| MH160363.1  | ATGAGCCAGACCCAAACCCCGGCCCCAGTTGGGCCGGGCGACCCAGATGTTTACTTAAAA | 60 |
| ON152715.1  | ATGAGCCAGACCCAAACCCCGGCCCCAGTTGGGCCGGGCGACCCAGATGTTTACTTAAAA | 60 |
| MN401205.1  | ATGAGCCAGACCCAAACCCCGGCCCCAGTTGGGCCGGGCGACCCAGATGTTTACTTAAAA | 60 |
| MN401207.1  | ATGAGCCAGACCCAAACCCCGGCCCCAGTTGGGCCGGGCGACCCAGATGTTTACTTAAAA | 60 |
| MN401202.1  | ATGAGCCAGACCCAAACCCCGGCCCCAGTTGGGCCGGGCGACCCAGATGTTTACTTAAAA | 60 |
| MG999858.1  | ATGAGCCAGACCCAAACCCCGGCCCCAGTTGGGCCGGGCGACCCAGATGTTTACTTAAAA | 60 |
| KY922718.1  | ATGAGCCAGACCCAAACCCCGGCCCCAGTTGGGCCGGGCGACCCAGATGTTTACTTAAAA | 60 |
| MG999891.1  | ATGAGCCAGACCCAAACCCCGGCCCCAGTTGGGCCGGGCGACCCAGATGTTTACTTAAAA | 60 |
| KY922719.1  | ATGAGCCAGACCCAAACCCCGGCCCCAGTTGGGCCGGGCGACCCAGATGTTTACTTAAAA | 60 |
| MN401203.1  | ATGAGCCAGACCCAAACCCCGGCCCCAGTTGGGCCGGGCGACCCAGATGTTTACTTAAAA | 60 |
| MG999880.1  | ATGAGCCAGACCCAAACCCCGGCCCCAGTTGGGCCGGGCGACCCAGATGTTTACTTAAAA | 60 |
| ON513441.1  | ATGAGCCAGACCCAAACCCCGGCCCCAGTTGGGCCGGGCGACCCAGATGTTTACTTAAAA | 60 |
| MH999851.1  | ATGAGCCAGACCCAAACCCCGGCCCCAGTTGGGCCGGGCGACCCAGATGTTTACTTAAAA | 60 |
| MN401204.1  | ATGAGCCAGACCCAAACCCCGGCCCCAGTTGGGCCGGGCGACCCAGATGTTTACTTAAAA | 60 |
| MG999838.1  | ATGAGCCAGACCCAAACCCCGGCCCCAGTTGGGCCGGGCGACCCAGATGTTTACTTAAAA | 60 |
| MH999842.1  | ATGAGCCAGACCCAAACCCCGGCCCCAGTTGGGCCGGGCGACCCAGATGTTTACTTAAAA | 60 |
| ON960055.1  | ATGAGCCAGACCCAAACCCCGGCCCCAGTTGGGCCGGGCGACCCAGATGTTTACTTAAAA | 60 |
| MN401208.1  | ATGAGCCAGACCCAAACCCCGGCCCCAGTTGGGCCGGGCGACCCAGATGTTTACTTAAAA | 60 |
| MH999849.1  | ATGAGCCAGACCCAAACCCCGGCCCCAGTTGGGCCGGGCGACCCAGATGTTTACTTAAAA | 60 |
| MH999845.1  | ATGAGCCAGACCCAAACCCCGGCCCCAGTTGGGCCGGGCGACCCAGATGTTTACTTAAAA | 60 |
| OP297884.1  | ATGAGCCAGACCCAAACCCCGGCCCCAGTTGGGCCGGGCGACCCAGATGTTTACTTAAAA | 60 |
| J02220.1    | ATGAGCCAGACCCAAACCCCGGCCCCAGTTGGGCCGGGCGACCCAGATGTTTACTTAAAA | 60 |
| MK952183.1  | ATGAGCCAGACCCAAACCCCGGCCCCAGTTGGGCCGGGCGACCCAGATGTTTCTTAAAA  | 60 |
| LT594105.1  | ATGAGCCAGACCCAAACCCCGGCCCCAGTTGGGCCGGGCGACCCAGATGTTTACTTAAAA | 60 |
| MK952184.1  | ATGAGCCAGACCCAAACCCCGGCCCCAGTTGGGCCGGGCGACCCAGATGTTTCTTAAAA  | 60 |
| KX424525.1  | ATGAGCCAGACCCAAACCCCGGCCCCAGTTGGGCCGGGCGACCCAGATGTTTACTTAAAA | 60 |
| MK952185.1  | ATGAGCCAGACCCAAACCCCGGCCCCAGTTGGGCCGGGCGACCCAGATGTTTCTTAAAA  | 60 |
| OP297862.1  | ATGAGCCAGACCCAAACCCCGGCCCCAGTTGGGCCGGGCGACCCAGATGTTTACTTAAAA | 60 |
| MN401206.1  | ATGAGCCAGACCCAAACCCCGGCCCCAGTTGGGCCGGGCGACCCAGATGTTTACTTAAAA | 60 |
| OP297872.1  | ATGAGCCAGACCCAAACCCCGGCCCCAGTTGGGCCGGGCGACCCAGATGTTTACTTAAAA | 60 |
| HM585502.2  | ATGAGCCAGACCCAAACCCCGGCCCCAGTTGGGCCGGGCGACCCAGATGTTTACTTAAAA | 60 |
| KU310660.1  | ATGAGCCAGACCCAAACCCCGGCCCCAGTTGGGCCGGGCGACCCAGATGTTTACTTAAAA | 60 |
| KU310661.1  | ATGAGCCAGACCCAAACCCCGGCCCCAGTTGGGCCGGGCGACCCAGATGTTTACTTAAAA | 60 |
| DQ889502.1  | ATGAGCCAGACCCAAACCCCGGCCCCAGTTGGGCCGGGCGACCCAGATGTTTACTTAAAA | 60 |
| AB618031.1  | ATGAGCCAGACCCAAACCCCGGCCCCAGTTGGGCCGGGCGACCCAGATGTTTACTTAAAA | 60 |
| OP297885.1  | ATGAGCCAGACCCAAACCCCGGCCCCAGTTGGGCCGGGCGACCCAGATGTTTACTTAAAA | 60 |
| ON960057.1  | ATGAGCCAGACCCAAACCCCGGCCCCAGTTGGGCCGGGCGACCCAGATGTTTACTTAAAA | 60 |
| ON960061.1  | ATGAGCCAGACCCAAACCCCGGCCCCAGTTGGGCCGGGCGACCCAGATGTTTACTTAAAA | 60 |
| LT594111.1  | ATGAGCCAGACCCAAACCCCGGCCCCAGTTGGGCCGGGCGACCCAGATGTTTACTTAAAA | 60 |
| OP297886.1  | ATGAGCCAGACCCAAACCCCGGCCCCAGTTGGGCCGGGCGACCCAGATGTTTACTTAAAA | 60 |
| MG999894.1  | ATGAGCCAGACCCAAACCCCGGCCCCAGTTGGGCCGGGCGACCCAGATGTTTACTTAAAA | 60 |
| KM222726.1  | ATGAGCCAGACCCAAACCCCGGCCCCAGTTGGGCCGGGCGACCCAGATGTTTACTTAAAA | 60 |
| ON960056.1  | ATGAGCCAGACCCAAACCCCGGCCCCAGTTGGGCCGGGCGACCCAGATGTTTACTTAAAA | 60 |
| MG999851.1  | ATGAGCCAGACCCAAACCCCGGCCCCAGTTGGGCCGGGCGACCCAGATGTTTACTTAAAA | 60 |
| OP297860.1  | ATGAGCCAGACCCAAACCCCGGCCCCAGTTGGGCCGGGCGACCCAGATGTTTACTTAAAA | 60 |

\*\*\*\*\*

[illegible]

\*\*\*\*\*

[illegible]

[illegible]

[illegible]

|             |                                                            |     |
|-------------|------------------------------------------------------------|-----|
| NC_001806.2 | CCCAGGGATCCACGACAACCCCGGTCTCCAGGGAGCCCCGGTCTCCCGGGAGCCCCGG | 420 |
| OP297876.1  | CCCAGGGATCCACGACAACCCCGGTCT-----CCCAGGGAGCCCCGG            | 402 |
| KT425108.1  | CCCAGGGATCCACGACAACCCCGGTCT-----CCCAGGGAGCCCCGG            | 402 |
| OP297880.1  | CCCAGGGATCCACGACAACCCCGGTCT-----CCCAGGGAGCCCCGG            | 402 |
| OP297875.1  | CCCAGGGATCCACGACAACCCCGGTCT-----CCCAGGGAGCCCCGG            | 402 |
| ON007163.1  | CCCAGGGATCCACGACAACCCCGGTCT-----CCCAGGGAGCCCCGG            | 402 |
| ON007155.1  | CCCAGGGATCCACGACAACCCCGGTCT-----CCCAGGGAGCCCCGG            | 402 |
| OP297877.1  | CCCAGGGATCCACGACAACCCCGGTCT-----CCCAGGGAGCCCCGG            | 402 |
| MN401201.1  | CCCAGGGATCCACGACAACCCCGGTCT-----CCCAGGGAGCCCCGG            | 402 |
| ON960054.1  | CCCAGGGATCCACGACAACCCCGGTCT-----CCCAGGGAGCCCCGG            | 402 |
| ON007144.1  | CCCAGGGATCCACGACAACCCCGGTCT-----CCCAGGGAGCCCCGG            | 402 |
| LT594457.1  | CCCAGGGATCCACGACAACCCCGGTCT-----CCCAGGGAGCCCCGG            | 402 |
| LT594122.1  | CCCAGGGATCCACGACAACCCCGGTCT-----CCCAGGGAGCCCCGG            | 402 |
| OP297863.1  | CCCAGGGATCCACGACAACCCCGGTCT-----CCCAGGGAGCCCCGG            | 402 |
| ON152716.1  | CCCAGGGATCCACGACAACCCCGGTCT-----CCCAGGGAGCCCCGG            | 402 |
| MH160374.1  | CCCAGGGATCCACGACAACCCCGGTCT-----CCCAGGGAGCCCCGG            | 402 |
| MH999846.1  | CCCAGGGATCCACGACAACCCCGGTCT-----CCCAGGGAGCCCCGG            | 402 |
| LT594108.1  | CCCAGGGATCCACGACAACCCCGGTCT-----CCCAGGGAGCCCCGG            | 402 |
| MH160373.1  | CCCAGGGATCCACGACAACCCCGGTCT-----CCCAGGGAGCCCCGG            | 402 |
| OP297866.1  | CCCAGGGATCCACGACAACCCCGGTCT-----CCCAGGGAGCCCCGG            | 402 |
| LT594107.1  | CCCAGGGATCCACGACAACCCCGGTCT-----CCCAGGGAGCCCCGG            | 402 |
| MG999856.1  | CCCAGGGATCCACGACAACCCCGGTCT-----CCCAGGGAGCCCCGG            | 402 |
| MH160363.1  | CCCAGGGATCCACGACAACCCCGGTCT-----CCCAGGGAGCCCCGG            | 402 |
| ON152715.1  | CCCAGGGATCCACGACAACCCCGGTCT-----CCCAGGGAGCCCCGG            | 402 |
| MN401205.1  | CCCAGGGATCCACGACAACCCCGGTCT-----CCCAGGGAGCCCCGG            | 402 |
| MN401207.1  | CCCAGGGATCCACGACAACCCCGGTCT-----CCCAGGGAGCCCCGG            | 402 |
| MN401202.1  | CCCAGGGATCCACGACAACCCCGGTCT-----CCCAGGGAGCCCCGG            | 402 |
| MG999858.1  | CCCAGGGATCCACGACAACCCCGGTCT-----CCCAGGGAGCCCCGG            | 402 |
| KY922718.1  | CCCAGGGATCCACGACAACCCCGGTCT-----CCCAGGGAGCCCCGG            | 402 |
| MG999891.1  | CCCAGGGATCCACGACAACCCCGGTCT-----CCCAGGGAGCCCCGG            | 402 |
| KY922719.1  | CCCAGGGATCCACGACAACCCCGGTCT-----CCCAGGGAGCCCCGG            | 402 |
| MN401203.1  | CCCAGGGATCCACGACAACCCCGGTCT-----CCCAGGGAGCCCCGG            | 402 |
| MG999880.1  | CCCAGGGATCCACGACAACCCCGGTCT-----CCCAGGGAGCCCCGG            | 402 |
| ON153441.1  | CCCAGGGATCCACGACAACCCCGGTCT-----CCCAGGGAGCCCCGG            | 402 |
| MH999851.1  | CCCAGGGATCCACGACAACCCCGGTCT-----CCCAGGGAGCCCCGG            | 402 |
| MN401204.1  | CCCAGGGATCCACGACAACCCCGGTCT-----CCCAGGGAGCCCCGG            | 402 |
| MG999838.1  | CCCAGGGATCCACGACAACCCCGGTCT-----CCCAGGGAGCCCCGG            | 402 |
| MH999842.1  | CCCAGGGATCCACGACAACCCCGGTCT-----CCCAGGGAGCCCCGG            | 402 |
| ON960055.1  | CCCAGGGATCCACGACAACCCCGGTCT-----CCCAGGGAGCCCCGG            | 402 |
| MN401208.1  | CCCAGGGATCCACGACAACCCCGGTCT-----CCCAGGGAGCCCCGG            | 402 |
| MH999849.1  | CCCAGGGATCCACGACAACCCCGGTCT-----CCCAGGGAGCCCCGG            | 402 |
| MH999845.1  | CCCAGGGATCCACGACAACCCCGGTCT-----CCCAGGGAGCCCCGG            | 402 |
| OP297884.1  | CCCAGGGATCCACGACAACCCCGGTCT-----CCCAGGGAGCCCCGG            | 402 |
| J02220.1    | CCCAGGGATCCACGACAACCCCGGTCT-----CCCAGGGAGCCCCGG            | 402 |
| MK952183.1  | CCCAGGGATCCACGACAACCCCGGTCT-----CCCAGGGAGCCCCGG            | 402 |
| LT594105.1  | CCCAGGGATCCACGACAACCCCGGTCT-----CCCAGGGAGCCCCGG            | 402 |
| MK952184.1  | CCCAGGGATCCACGACAACCCCGGTCT-----CCCAGGGAGCCCCGG            | 402 |
| KX424525.1  | CCCAGGGATCCACGACAACCCCGGTCT-----CCCAGGGAGCCCCGG            | 402 |
| MK952185.1  | CCCAGGGATCCACGACAACCCCGGTCT-----CCCAGGGAGCCCCGG            | 402 |
| OP297862.1  | CCCAGGGATCCACGACAACCCCGGTCT-----CCCAGGGAGCCCCGG            | 402 |
| MN401206.1  | CCCAGGGATCCACGACAACCCCGGTCT-----CCCAGGGAGCCCCGG            | 402 |
| OP297872.1  | CCCAGGGATCCACGACAACCCCGGTCT-----CCCAGGGAGCCCCGG            | 402 |
| HM585502.2  | CCCAGGGATCCACGACAACCCCGGTCT-----CCCAGGGAGCCCCGG            | 402 |
| KU310660.1  | CCCAGGGATCCACGACAGCCCCGTCT-----CCCAGGGAGCCCCGG             | 402 |
| KU310661.1  | CCCAGGGATCCACGACAGCCCCGTCT-----CCCAGGGAGCCCCGG             | 402 |
| DQ889502.1  | CCCAGGGATCCACGACAGCCCCGTCT-----CCCAGGGAGCCCCGG             | 402 |
| AB618031.1  | CCCAGGGATCCACGACAGCCCCGTCT-----CCCAGGGAGCCCCGG             | 402 |
| OP297885.1  | CCCAGGGATCCACGACAGCCCCGTCT-----CCCAGGGAGCCCCGG             | 402 |
| ON960057.1  | CCCAGGGATCCACGACAGCCCCGTCT-----CCCAGGGAGCCCCGG             | 402 |
| ON960061.1  | CCCAGGGATCCACGACAGCCCCGTCT-----CCCAGGGAGCCCCGG             | 402 |
| LT594111.1  | CCCAGGGATCCACGACAGCCCCGTCT-----CCCAGGGAGCCCCGG             | 402 |
| OP297886.1  | CCCAGGGATCCACGACAGCCCCGTCT-----CCCAGGGAGCCCCGG             | 402 |
| MG999894.1  | CCCAGGGATCCACGACAGCCCCGTCT-----CCCAGGGAGCCCCGG             | 402 |
| KM222726.1  | CCCAGGGATCCACGACAGCCCCGTCT-----CCCAGGGAGCCCCGG             | 402 |
| ON960056.1  | CCCAGGGATCCACGACAGCCCCGTCT-----CCCAGGGAGCCCCGG             | 402 |
| MG999851.1  | CCCAGGGATCCACGACAGCCCCGTCT-----CCCAGGGAGCCCCGG             | 402 |
| OP297860.1  | CCCAGGGATCCACGACAGCCCCGTCT-----CCCAGGGAGCCCCGG             | 402 |

\*\*\*\*\*

\*\*\*

[illegible]



|             |        |     |
|-------------|--------|-----|
| NC_001806.2 | GTATAG | 486 |
| OP297876.1  | GTATAG | 468 |
| KT425108.1  | GTATAG | 468 |
| OP297880.1  | GTATAG | 468 |
| OP297875.1  | GTATAG | 468 |
| ON007163.1  | GTATAG | 468 |
| ON007155.1  | GTATAG | 468 |
| OP297877.1  | GTATAG | 468 |
| MN401201.1  | GTATAG | 468 |
| ON960054.1  | GTATAG | 468 |
| ON007144.1  | GTATAG | 468 |
| LT594457.1  | GTATAG | 468 |
| LT594122.1  | GTATAG | 468 |
| OP297863.1  | GTATAG | 468 |
| ON152716.1  | GTATAG | 468 |
| MH160374.1  | GTATAG | 468 |
| MH999846.1  | GTATAG | 468 |
| LT594108.1  | GTATAG | 468 |
| MH160373.1  | GTATAG | 468 |
| OP297866.1  | GTATAG | 468 |
| LT594107.1  | GTATAG | 468 |
| MG999856.1  | GTATAG | 468 |
| MH160363.1  | GTATAG | 468 |
| ON152715.1  | GTATAG | 468 |
| MN401205.1  | GTATAG | 468 |
| MN401207.1  | GTATAG | 468 |
| MN401202.1  | GTATAG | 468 |
| MG999858.1  | GTATAG | 468 |
| KY922718.1  | GTATAG | 468 |
| MG999891.1  | GTATAG | 468 |
| KY922719.1  | GTATAG | 468 |
| MN401203.1  | GTATAG | 468 |
| MG999880.1  | GTATAG | 468 |
| ON513441.1  | GTATAG | 468 |
| MH999851.1  | GTATAG | 468 |
| MN401204.1  | GTATAG | 468 |
| MG999838.1  | GTATAG | 468 |
| MH999842.1  | GTATAG | 468 |
| ON960055.1  | GTATAG | 468 |
| MN401208.1  | GTATAG | 468 |
| MH999849.1  | GTATAG | 468 |
| MH999845.1  | GTATAG | 468 |
| OP297884.1  | GTATAG | 468 |
| J02220.1    | GTATAG | 468 |
| MK952183.1  | GTATAG | 468 |
| LT594105.1  | GTATAG | 468 |
| MK952184.1  | GTATAG | 468 |
| KX424525.1  | GTATAG | 468 |
| MK952185.1  | GTATAG | 468 |
| OP297862.1  | GTATAG | 468 |
| MN401206.1  | GTATAG | 468 |
| OP297872.1  | GTATAG | 468 |
| HM585502.2  | GTATAG | 468 |
| KU310660.1  | GTATAG | 468 |
| KU310661.1  | GTATAG | 468 |
| DQ889502.1  | GTATAG | 468 |
| AB618031.1  | GTATAG | 468 |
| OP297885.1  | GTATAG | 468 |
| ON960057.1  | GTATAG | 468 |
| ON960061.1  | GTATAG | 468 |
| LT594111.1  | GTATAG | 468 |
| OP297886.1  | GTATAG | 468 |
| MG999894.1  | GTATAG | 468 |
| KM222726.1  | GTATAG | 468 |
| ON960056.1  | GTATAG | 468 |
| MG999851.1  | GTATAG | 468 |
| OP297860.1  | GTATAG | 468 |

\*\*\*\*\*
