# Supplementary material for: Discovery of a Novel Intron in US10/US11/US12 of HSV-1 Strain 17
Source: MDPI journal article supplement (doi:10.3390/v15112144), 2023-10-25
Supplement: s1 [file s1]

[illegible]

|   |   |   |   |   |   |   |   |   |    |    |    |    |    |    |    |    |    |    |    |    |    |    |    |    |    |    |    |    |    |    |    |    |    |    |    |    |    |    |    |    |    |    |    |    |    |    |    |    |    |    |    |    |    |    |    |    |    |    |    |    |    |    |    |    |    |    |    |    |    |    |    |    |    |    |    |    |    |    |    |    |    |    |    |    |    |    |    |      |    |    |    |    |    |    |    |    |    |    |     |
|---|---|---|---|---|---|---|---|---|----|----|----|----|----|----|----|----|----|----|----|----|----|----|----|----|----|----|----|----|----|----|----|----|----|----|----|----|----|----|----|----|----|----|----|----|----|----|----|----|----|----|----|----|----|----|----|----|----|----|----|----|----|----|----|----|----|----|----|----|----|----|----|----|----|----|----|----|----|----|----|----|----|----|----|----|----|----|----|------|----|----|----|----|----|----|----|----|----|----|-----|
| 1 | 2 | 3 | 4 | 5 | 6 | 7 | 8 | 9 | 10 | 11 | 12 | 13 | 14 | 15 | 16 | 17 | 18 | 19 | 20 | 21 | 22 | 23 | 24 | 25 | 26 | 27 | 28 | 29 | 30 | 31 | 32 | 33 | 34 | 35 | 36 | 37 | 38 | 39 | 40 | 41 | 42 | 43 | 44 | 45 | 46 | 47 | 48 | 49 | 50 | 51 | 52 | 53 | 54 | 55 | 56 | 57 | 58 | 59 | 60 | 61 | 62 | 63 | 64 | 65 | 66 | 67 | 68 | 69 | 70 | 71 | 72 | 73 | 74 | 75 | 76 | 77 | 78 | 79 | 80 | 81 | 82 | 83 | 84 | 85 | 86 | 87 | 88 | 89   | 90 | 91 | 92 | 93 | 94 | 95 | 96 | 97 | 98 | 99 | 100 |
| 1 | 2 | 3 | 4 | 5 | 6 | 7 | 8 | 9 | 10 | 11 | 12 | 13 | 14 | 15 | 16 | 17 | 18 | 19 | 20 | 21 | 22 | 23 | 24 | 25 | 26 | 27 | 28 | 29 | 30 | 31 | 32 | 33 | 34 | 35 | 36 | 37 | 38 | 39 | 40 | 41 | 42 | 43 | 44 | 45 | 46 | 47 | 48 | 49 | 50 | 51 | 52 | 53 | 54 | 55 | 56 | 57 | 58 | 59 | 60 | 61 | 62 | 63 | 64 | 65 | 66 | 67 | 68 | 69 | 70 | 71 | 72 | 73 | 74 | 75 | 76 | 77 | 78 | 79 | 80 | 81 | 82 | 83 | 84 | 85 | 86 | 87 | 88 | 89   | 90 | 91 | 92 | 93 | 94 | 95 | 96 | 97 | 98 | 99 | 100 |
| 1 | 2 | 3 | 4 | 5 | 6 | 7 | 8 | 9 | 10 | 11 | 12 | 13 | 14 | 15 | 16 | 17 | 18 | 19 | 20 | 21 | 22 | 23 | 24 | 25 | 26 | 27 | 28 | 29 | 30 | 31 | 32 | 33 | 34 | 35 | 36 | 37 | 38 | 39 | 40 | 41 | 42 | 43 | 44 | 45 | 46 | 47 | 48 | 49 | 50 | 51 | 52 | 53 | 54 | 55 | 56 | 57 | 58 | 59 | 60 | 61 | 62 | 63 | 64 | 65 | 66 | 67 | 68 | 69 | 70 | 71 | 72 | 73 | 74 | 75 | 76 | 77 | 78 | 79 | 80 | 81 | 82 | 83 | 84 | 85 | 86 | 87 | 88 | 89   | 90 | 91 | 92 | 93 | 94 | 95 | 96 | 97 | 98 | 99 | 100 |
| 1 | 2 | 3 | 4 | 5 | 6 | 7 | 8 | 9 | 10 | 11 | 12 | 13 | 14 | 15 | 16 | 17 | 18 | 19 | 20 | 21 | 22 | 23 | 24 | 25 | 26 | 27 | 28 | 29 | 30 | 31 | 32 | 33 | 34 | 35 | 36 | 37 | 38 | 39 | 40 | 41 | 42 | 43 | 44 | 45 | 46 | 47 | 48 | 49 | 50 | 51 | 52 | 53 | 54 | 55 | 56 | 57 | 58 | 59 | 60 | 61 | 62 | 63 | 64 | 65 | 66 | 67 | 68 | 69 | 70 | 71 | 72 | 73 | 74 | 75 | 76 | 77 | 78 | 79 | 80 | 81 | 82 | 83 | 84 | 85 | 86 | 87 | 88 | 89   | 90 | 91 | 92 | 93 | 94 | 95 | 96 | 97 | 98 | 99 | 100 |
| 1 | 2 | 3 | 4 | 5 | 6 | 7 | 8 | 9 | 10 | 11 | 12 | 13 | 14 | 15 | 16 | 17 | 18 | 19 | 20 | 21 | 22 | 23 | 24 | 25 | 26 | 27 | 28 | 29 | 30 | 31 | 32 | 33 | 34 | 35 | 36 | 37 | 38 | 39 | 40 | 41 | 42 | 43 | 44 | 45 | 46 | 47 | 48 | 49 | 50 | 51 | 52 | 53 | 54 | 55 | 56 | 57 | 58 | 59 | 60 | 61 | 62 | 63 | 64 | 65 | 66 | 67 | 68 | 69 | 70 | 71 | 72 | 73 | 74 | 75 | 76 | 77 | 78 | 79 | 80 | 81 | 82 | 83 | 84 | 85 | 86 | 87 | 88 | 89   | 90 | 91 | 92 | 93 | 94 | 95 | 96 | 97 | 98 | 99 | 100 |
| 1 | 2 | 3 | 4 | 5 | 6 | 7 | 8 | 9 | 10 | 11 | 12 | 13 | 14 | 15 | 16 | 17 | 18 | 19 | 20 | 21 | 22 | 23 | 24 | 25 | 26 | 27 | 28 | 29 | 30 | 31 | 32 | 33 | 34 | 35 | 36 | 37 | 38 | 39 | 40 | 41 | 42 | 43 | 44 | 45 | 46 | 47 | 48 | 49 | 50 | 51 | 52 | 53 | 54 | 55 | 56 | 57 | 58 | 59 | 60 | 61 | 62 | 63 | 64 | 65 | 66 | 67 | 68 | 69 | 70 | 71 | 72 | 73 | 74 | 75 | 76 | 77 | 78 | 79 | 80 | 81 | 82 | 83 | 84 | 85 | 86 | 87 | 88 | 89</ |    |    |    |    |    |    |    |    |    |    |     |

[illegible]

|            |   |   |   |   |   |   |   |   |   |   |   |   |   |   |   |   |   |   |   |   |   |   |   |   |   |   |   |   |   |   |   |   |   |   |   |   |   |   |   |   |   |   |   |   |   |   |   |   |   |   |   |   |     |   |   |   |   |   |   |   |
|------------|---|---|---|---|---|---|---|---|---|---|---|---|---|---|---|---|---|---|---|---|---|---|---|---|---|---|---|---|---|---|---|---|---|---|---|---|---|---|---|---|---|---|---|---|---|---|---|---|---|---|---|---|-----|---|---|---|---|---|---|---|
| 001806.2   | T | C | G | G | G | T | C | T | A | C | T | A | C | G | A | G | T | C | G | G | T | G | C | G | G | A | C | A | C | T | A | C | G | A | T | C | T | C | G | A | A | G | C | C | A | T | C | T | G | A | A | G | C   | C | G | T | C | C | G | A |
| MN136524.1 | T | C | G | G | G | T | C | T | A | C | T | A | C | G | A | G | T | C | G | G | T | G | C | G | G | A | C | A | C | T | A | C | G | A | T | C | T | C | G | A | A | G | C | C | A | T | C | T | G | A | A | G | C   | C | G | T | C | C | G | A |
| KX791954.1 | T | C | G | G | G | T | C | T | A | C | T | A | C | G | A | G | T | C | G | G | T | G | C | G | G | A | C | A | C | T | A | C | G | A | T | C | T | C | G | A | A | G | C | C | A | T | C | T | G | A | A | G | C   | C | G | T | C | C | G | A |
| KX791808.1 | T | C | G | G | G | T | C | T | A | C | T | A | C | G | A | G | T | C | G | G | T | G | C | G | G | A | C | A | C | T | A | C | G | A | T | C | T | C | G | A | A | G | C | C | A | T | C | T | G | A | A | G | C   | C | G | T | C | C | G | A |
| KT425109.1 | T | C | G | G | G | T | C | T | A | C | T | A | C | G | A | G | T | C | G | G | T | G | C | G | G | A | C | A | C | T | A | C | G | A | T | C | T | C | G | A | A | G | C | C | A | T | C | T | G | A | A | G | C   | C | G | T | C | C | G | A |
| ON007141.1 | T | C | G | G | G | T | C | T | A | C | T | A | C | G | A | G | T | C | G | G | T | G | C | G | G | A | C | A | C | T | A | C | G | A | T | C | T | C | G | A | A | G | C | C | A | T | C | T | G | A | A | G | C   | C | G | T | C | C | G | A |
| ON007134.1 | T | C | G | G | G | T | C | T | A | C | T | A | C | G | A | G | T | C | G | G | T | G | C | G | G | A | C | A | C | T | A | C | G | A | T | C | T | C | G | A | A | G | C | C | A | T | C | T | G | A | A | G | C   | C | G | T | C | C | G | A |
| ON007145.1 | T | C | G | G | G | T | C | T | A | C | T | A | C | G | A | G | T | C | G | G | T | G | C | G | G | A | C | A | C | T | A | C | G | A | T | C | T | C | G | A | A | G | C | C | A | T | C | T | G | A | A | G | C   | C | G | T | C | C | G | A |
| OP297874.1 | T | C | G | G | G | T | C | T | A | C | T | A | C | G | A | G | T | C | G | G | T | G | C | G | G | A | C | A | C | T | A | C | G | A | T | C | T | C | G | A | A | G | C | C | A | T | C | T | G | A | A | G | C   | C | G | T | C | C | G | A |
| OP297882.1 | T | C | G | G | G | T | C | T | A | C | T | A | C | G | A | G | T | C | G | G | T | G | C | G | G | A | C | A | C | T | A | C | G | A | T | C | T | C | G | A | A | G | C | C | A | T | C | T | G | A | A | G | C   | C | G | T | C | C | G | A |
| HM585498.2 | T | C | G | G | G | T | C | T | A | C | T | A | C | G | A | G | T | C | G | G | T | G | C | G | G | A | C | A | C | T | A | C | G | A | T | C | T | C | G | A | A | G | C | C | A | T | C | T | G | A | A | G | C   | C | G | T | C | C | G | A |
| ON007160.1 | T | C | G | G | G | T | C | T | A | C | T | A | C | G | A | G | T | C | G | G | T | G | C | G | G | A | C | A | C | T | A | C | G | A | T | C | T | C | G | A | A | G | C | C | A | T | C | T | G | A | A | G | C   | C | G | T | C | C | G | A |
| HM585514.2 | T | C | G | G | G | T | C | T | A | C | T | A | C | G | A | G | T | C | G | G | T | G | C | G | G | A | C | A | C | T | A | C | G | A | T | C | T | C | G | A | A | G | C | C | A | T | C | T | G | A | A | G | C</ |   |   |   |   |   |   |   |

\*\*\*\*\* \* . \*\*\*\*\* \*\*\*\*\* \*\*\*\*\* \*\*\*\*\* \*\*\*\*\* \*\*\*\*\* \*\*\*\*\* \*\*\*\*\* \*\*\*\*\*

\*\*\*\*\*

|             |                          |                                     |     |
|-------------|--------------------------|-------------------------------------|-----|
| NC_001806.2 | CCCAGGGATCCACGACAACCCCGG | GTCTCCAGGGAGCCCCGGTCTCCCGGGAGCCCCGG | 420 |
| MN136524.1  | CCCAGGGATCCACGACAACCCCG  | -----GGAGCCCCGG                     | 393 |
| KX791954.1  | CCCAGGGATCCACGACAACCCCG  | -----GGAGCCCCGG                     | 393 |
| KX791808.1  | CCCAGGGATCCACGACAACCCCG  | -----GGAGCCCCGG                     | 393 |
| KT425109.1  | CCCAGGGATCCACGACAACCCCG  | -----GGAGCCCCGG                     | 393 |
| ON007141.1  | CCCAGGGATCCACGACAACCCCG  | -----GGAGCCCCGG                     | 393 |
| ON007134.1  | CCCAGGGATCCACGACAACCCCG  | -----GGAGCCCCGG                     | 393 |
| ON007145.1  | CCCAGGGATCCACGACAACCCCG  | -----GGAGCCCCGG                     | 393 |
| OP297874.1  | CCCAGGGATCCACGACAACCCCG  | -----GGAGCCCCGG                     | 393 |
| OP297882.1  | CCCAGGGATCCACGACAACCCCG  | -----GGAGCCCCGG                     | 393 |
| HM585498.2  | CCCAGGGATCCACGACAACCCCG  | -----GGAGCCCCGG                     | 393 |
| ON007160.1  | CCCAGGGATCCACGACAACCCCG  | -----GGAGCCCCGG                     | 393 |
| HM585514.2  | CCCAGGGATCCACGACAACCCCG  | -----GGAGCCCCGG                     | 393 |
| OP297867.1  | CCCAGGGATCCACGACAACCCCG  | -----GGAGCCCCGG                     | 393 |
| LT594109.1  | CCCAGGGATCCACGACAACCCCG  | -----GGAGCCCCGG                     | 393 |
| LT594112.1  | CCCAGGGATCCACGACAACCCCG  | -----GGAGCCCCGG                     | 393 |
| HM585511.2  | CCCAGGGATCCACGACAACCCCG  | -----GGAGCCCCGG                     | 393 |
| KF498959.1  | CCCAGGGATCCACGACAACCCCG  | -----GGAGCCCCGG                     | 393 |
| MG999888.1  | CCCAGGGATCCACGACAACCCCG  | -----GGAGCCCCGG                     | 393 |
| ON960058.1  | CCCAGGGATCCACGACAACCCCG  | -----GGAGCCCCGG                     | 393 |
| MH160359.1  | CCCAGGGATCCACGACAACCCCG  | -----GGAGCCCCGG                     | 393 |
| MG999885.1  | CCCAGGGATCCACGACAACCCCG  | -----GGAGCCCCGG                     | 393 |
| MH999844.1  | CCCAGGGATCCACGACAACCCCG  | -----GGAGCCCCGG                     | 393 |
| MH160361.1  | CCCAGGGATCCACGACAACCCCG  | -----GGAGCCCCGG                     | 393 |
| MG999865.1  | CCCAGGGATCCACGACAACCCCG  | -----GGAGCCCCGG                     | 393 |
| MG999876.1  | CCCAGGGATCCACGACAACCCCG  | -----GGAGCCCCGG                     | 393 |
| GU734771.1  | CCCAGGGATCCACGACAACCCCG  | -----GGAGCCCCGG                     | 393 |
| MG999869.1  | CCCAGGGATCCACGACAACCCCG  | -----GGAGCCCCGG                     | 393 |
| MG999878.1  | CCCAGGGATCCACGACAACCCCG  | -----GGAGCCCCGG                     | 393 |
| ON960060.1  | CCCAGGGATCCACGACAACCCCG  | -----GGAGCCCCGG                     | 393 |
| MH999843.1  | CCCAGGGATCCACGACAACCCCG  | -----GGAGCCCCGG                     | 393 |
| MH999850.1  | CCCAGGGATCCACGACAACCCCG  | -----GGAGCCCCGG                     | 393 |
| MG999861.1  | CCCAGGGATCCACGACAACCCCG  | -----GGAGCCCCGG                     | 393 |
| KX791871.1  | CCCAGGGATCCACGACAACCCCG  | -----GGAGCCCCGG                     | 393 |
| OP297861.1  | CCCAGGGATCCACGACAACCCCG  | -----GGAGCCCCGG                     | 393 |
| MG999864.1  | CCCAGGGATCCACGACAACCCCG  | -----GGAGCCCCGG                     | 393 |
| OL638990.1  | CCCAGGGATCCACGACAACCCCG  | -----GGAGCCCCGG                     | 393 |
| MH999838.1  | CCCAGGGATCCACGACAACCCCG  | -----GGAGCCCCGG                     | 393 |
| KU310659.1  | CCCAGGGATCCACGACAACCCCG  | -----GGAGCCCCGG                     | 393 |
| KX791923.1  | CCCAGGGATCCACGACAACCCCG  | -----GGAGCCCCGG                     | 393 |
| MG999845.1  | CCCAGGGATCCACGACAACCCCG  | -----GGAGCCCCGG                     | 393 |
| ON007132.1  | CCCAGGGATCCACGACAACCCCG  | -----GGAGCCCCGG                     | 393 |
| HM585497.2  | CCCAGGGATCCACGACAACCCCG  | -----GGAGCCCCGG                     | 393 |
| HM585500.2  | CCCAGGGATCCACGACAACCCCG  | -----GGAGCCCCGG                     | 393 |
| HM585499.2  | CCCAGGGATCCACGACAACCCCG  | -----GGAGCCCCGG                     | 393 |
| HM585504.2  | CCCAGGGATCCACGACAACCCCG  | -----GGAGCCCCGG                     | 393 |
| HM585496.2  | CCCAGGGATCCACGACAACCCCG  | -----GGAGCCCCGG                     | 393 |
| HM585506.2  | CCCAGGGATCCACGACAACCCCG  | -----GGAGCCCCGG                     | 393 |
| ON007139.1  | CCCAGGGATCCACGACAACCCCG  | -----GGAGCCCCGG                     | 393 |
| HM585509.2  | CCCAGGGATCCACGACAACCCCG  | -----GGAGCCCCGG                     | 393 |
| OP297883.1  | CCCAGGGATCCACGACAACCCCG  | -----GGAGCCCCGG                     | 393 |
| MN136523.1  | CCCAGGGATCCACGACAACCCCG  | -----GGAGCCCCGG                     | 393 |
| MH999841.1  | CCCAGGGATCCACGACAACCCCG  | -----GGAGCCCCGG                     | 393 |
| MH813983.1  | CCCAGGGATCCACGACAACCCCG  | -----GGAGCCCCGG                     | 393 |
| MH813990.1  | CCCAGGGATCCACGACAACCCCG  | -----GGAGCCCCGG                     | 393 |
| MH813994.1  | CCCAGGGATCCACGACAACCCCG  | -----GGAGCCCCGG                     | 393 |
| MH813989.1  | CCCAGGGATCCACGACAACCCCG  | -----GGAGCCCCGG                     | 393 |
| MH813985.1  | CCCAGGGATCCACGACAACCCCG  | -----GGAGCCCCGG                     | 393 |
| MH813987.1  | CCCAGGGATCCACGACAACCCCG  | -----GGAGCCCCGG                     | 393 |
| MH813993.1  | CCCAGGGATCCACGACAACCCCG  | -----GGAGCCCCGG                     | 393 |
| MH813992.1  | CCCAGGGATCCACGACAACCCCG  | -----GGAGCCCCGG                     | 393 |
| MH813988.1  | CCCAGGGATCCACGACAACCCCG  | -----GGAGCCCCGG                     | 393 |
| MH813984.1  | CCCAGGGATCCACGACAACCCCG  | -----GGAGCCCCGG                     | 393 |
| MH813982.1  | CCCAGGGATCCACGACAACCCCG  | -----GGAGCCCCGG                     | 393 |
| OP297864.1  | CCCAGGGATCCACGACAACCCCG  | -----GGAGCCCCGG                     | 393 |
| MH813991.1  | CCCAGGGATCCACGACAACCCCG  | -----GGAGCCCCGG                     | 393 |
| MH813986.1  | CCCAGGGATCCACGACAACCCCG  | -----GGAGCCCCGG                     | 393 |
| HM585512.2  | CCCAGGGATCCACGACAACCCCG  | -----GGAGCCCCGG                     | 393 |
| HM585515.2  | CCCAGGGATCCACGACAACCCCG  | -----GGAGCCCCGG                     | 393 |
| HM585513.2  | CCCAGGGATCCACGACAACCCCG  | -----GGAGCCCCGG                     | 393 |
| MH999839.1  | CCCAGGGATCCACGACAACCCCG  | -----GGAGCCCCGG                     | 393 |
| MH999840.1  | CCCAGGGATCCACGACAACCCCG  | -----GGATCCACGA                     | 393 |

\*\*\*\*\*

\*\*\* \*\*.\*.





|             |        |     |
|-------------|--------|-----|
| NC_001806.2 | GTATAG | 486 |
| MN136524.1  | GTATAG | 459 |
| KX791954.1  | GTATAG | 459 |
| KX791808.1  | GTATAG | 459 |
| KT425109.1  | GTATAG | 459 |
| ON007141.1  | GTATAG | 459 |
| ON007134.1  | GTATAG | 459 |
| ON007145.1  | GTATAG | 459 |
| OP297874.1  | GTATAG | 459 |
| OP297882.1  | GTATAG | 459 |
| HM585498.2  | GTATAG | 459 |
| ON007160.1  | GTATAG | 459 |
| HM585514.2  | GTATAG | 459 |
| OP297867.1  | GTATAG | 459 |
| LT594109.1  | GTATAG | 459 |
| LT594112.1  | GTATAG | 459 |
| HM585511.2  | GTATAG | 459 |
| KF498959.1  | GTATAG | 459 |
| MG999888.1  | GTATAG | 459 |
| ON960058.1  | GTATAG | 459 |
| MH160359.1  | GTATAG | 459 |
| MG999885.1  | GTATAG | 459 |
| MH999844.1  | GTATAG | 459 |
| MH160361.1  | GTATAG | 459 |
| MG999865.1  | GTATAG | 459 |
| MG999876.1  | GTATAG | 459 |
| GU734771.1  | GTATAG | 459 |
| MG999869.1  | GTATAG | 459 |
| MG999878.1  | GTATAG | 459 |
| ON960060.1  | GTATAG | 459 |
| MH999843.1  | GTATAG | 459 |
| MH999850.1  | GTATAG | 459 |
| MG999861.1  | GTATAG | 459 |
| KX791871.1  | GTATAG | 459 |
| OP297861.1  | GTATAG | 459 |
| MG999864.1  | GTATAG | 459 |
| OL638990.1  | GTATAG | 459 |
| MH999838.1  | GTATAG | 459 |
| KU310659.1  | GTATAG | 459 |
| KX791923.1  | GTATAG | 459 |
| MG999845.1  | GTATAG | 459 |
| ON007132.1  | GTATAG | 459 |
| HM585497.2  | GTATAG | 459 |
| HM585500.2  | GTATAG | 459 |
| HM585499.2  | GTATAG | 459 |
| HM585504.2  | GTATAG | 459 |
| HM585496.2  | GTATAG | 459 |
| HM585506.2  | GTATAG | 459 |
| ON007139.1  | GTATAG | 459 |
| HM585509.2  | GTATAG | 459 |
| OP297883.1  | GTATAG | 459 |
| MN136523.1  | GTATAG | 459 |
| MH999841.1  | GTATAG | 459 |
| MH813983.1  | GTATAG | 459 |
| MH813990.1  | GTATAG | 459 |
| MH813994.1  | GTATAG | 459 |
| MH813989.1  | GTATAG | 459 |
| MH813985.1  | GTATAG | 459 |
| MH813987.1  | GTATAG | 459 |
| MH813993.1  | GTATAG | 459 |
| MH813992.1  | GTATAG | 459 |
| MH813988.1  | GTATAG | 459 |
| MH813984.1  | GTATAG | 459 |
| MH813982.1  | GTATAG | 459 |
| OP297864.1  | GTATAG | 459 |
| MH813991.1  | GTATAG | 459 |
| MH813986.1  | GTATAG | 459 |
| HM585512.2  | GTATAG | 459 |
| HM585515.2  | GTATAG | 459 |
| HM585513.2  | GTATAG | 459 |
| MH999839.1  | GTATAG | 459 |
| MH999840.1  | GTATAG | 459 |

\*\*\*\*\*
