# Supplementary material for: Discovery of a Novel Intron in US10/US11/US12 of HSV-1 Strain 17
Source: Viruses. 2023 Oct 25;15(11):2144. doi: 10.3390/v15112144 (PMC10675037; doi:10.3390/v15112144)
Supplement: Supplementary file 1 [file viruses-15-02144-s001.zip]

Archive with 8 entries (8 files):
- Supplemental Data S1. 0-nt alignment.pdf
- Supplemental Data S2. 27-nt alignment.pdf
- Supplemental Data S3. 9-nt alignment.pdf
- Supplemental Data S4. 18-nt alignment.pdf
- Supplemental Data S5. 9X_nt_ins alignment.pdf
- Supplemental Data S6. non_9_gaps.alignment.pdf
- Supplemental Data S7. non_3_gaps.alignment.pdf
- Supplemental Methods and Figures.pdf
